# Supplementary material for: Prohibitin 1 Orchestrates Mitochondrial-ER Crosstalk via the VDAC1-GRP75-IP3R Axis to Drive Malignancy in Gastric Cancer
Source: Research Square preprint supplement (doi:10.21203/rs.3.rs-7625265/v1), 2025-10-03

Figure 1I PHB1

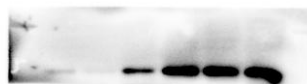

Figure 1I PHB2

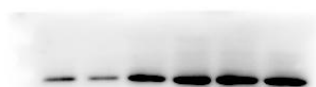

Figure 1I  $\beta$ -actin

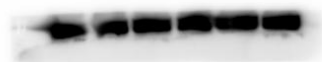

Figure 2A PHB1

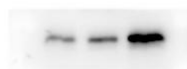

Figure 2A VDAC1

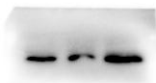

Figure 2A GRP75

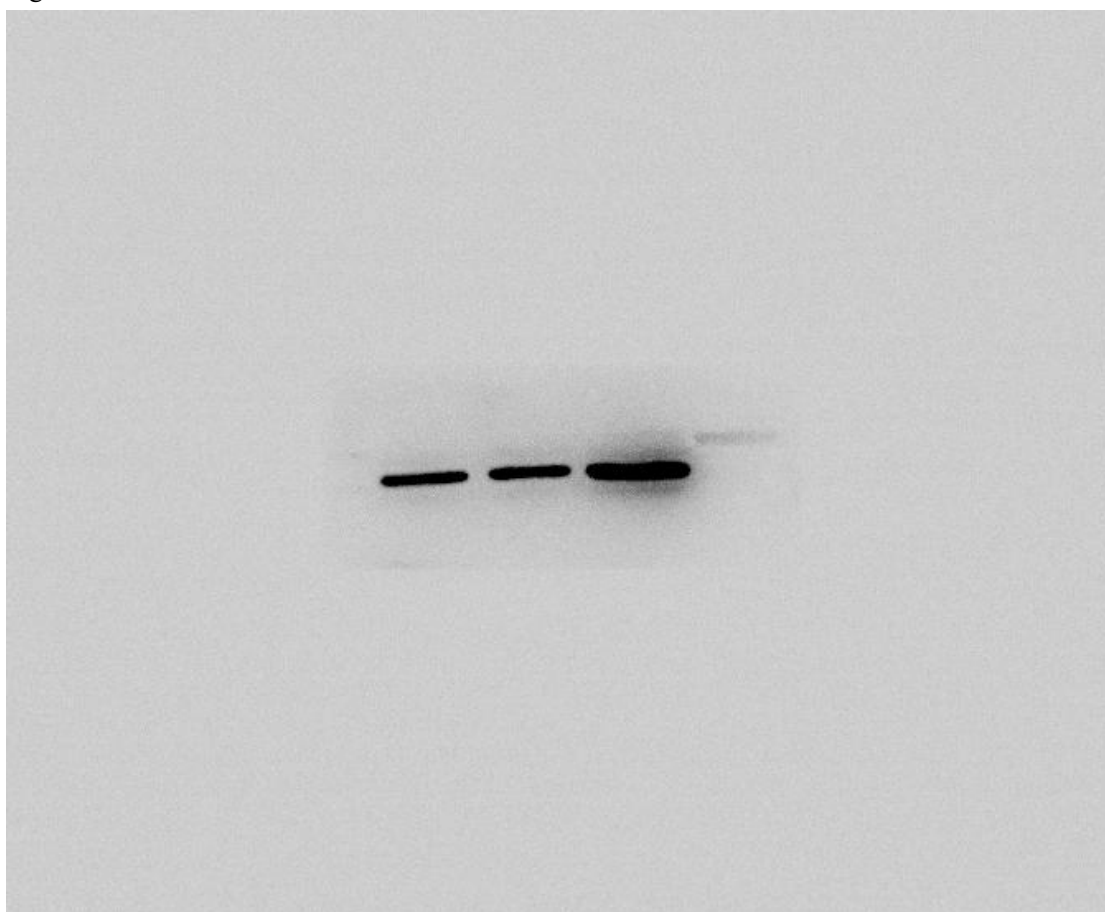

Figure 2A IP3R

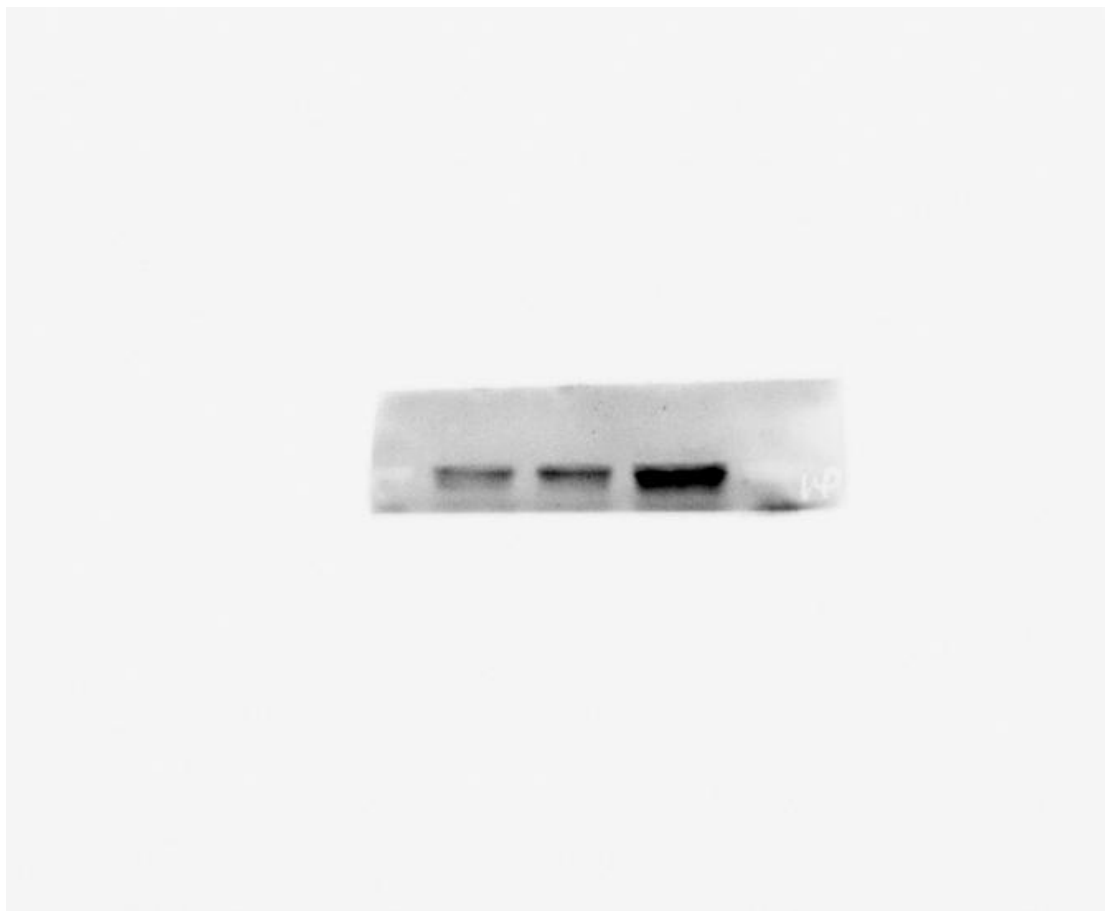

Figure 2A Vimentin

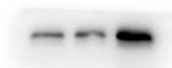

Figure 2A  $\beta$ -catenin

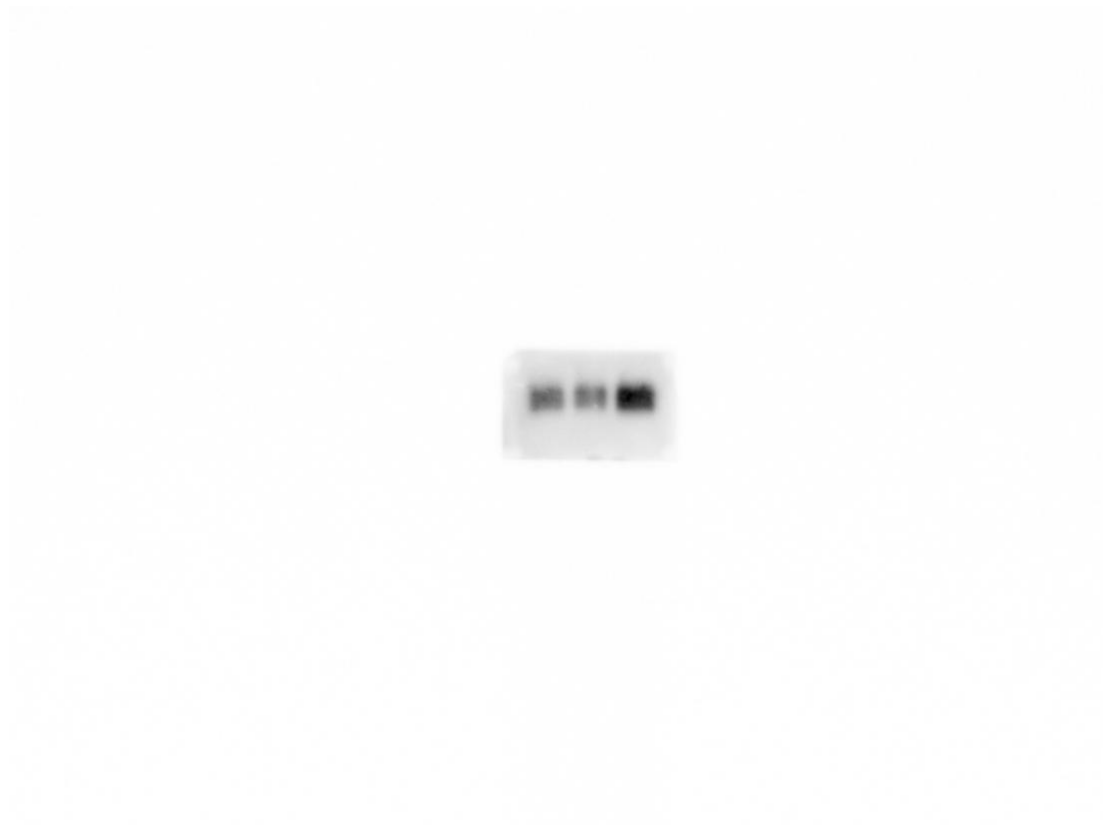

Figure 2A  $\beta$ -actin

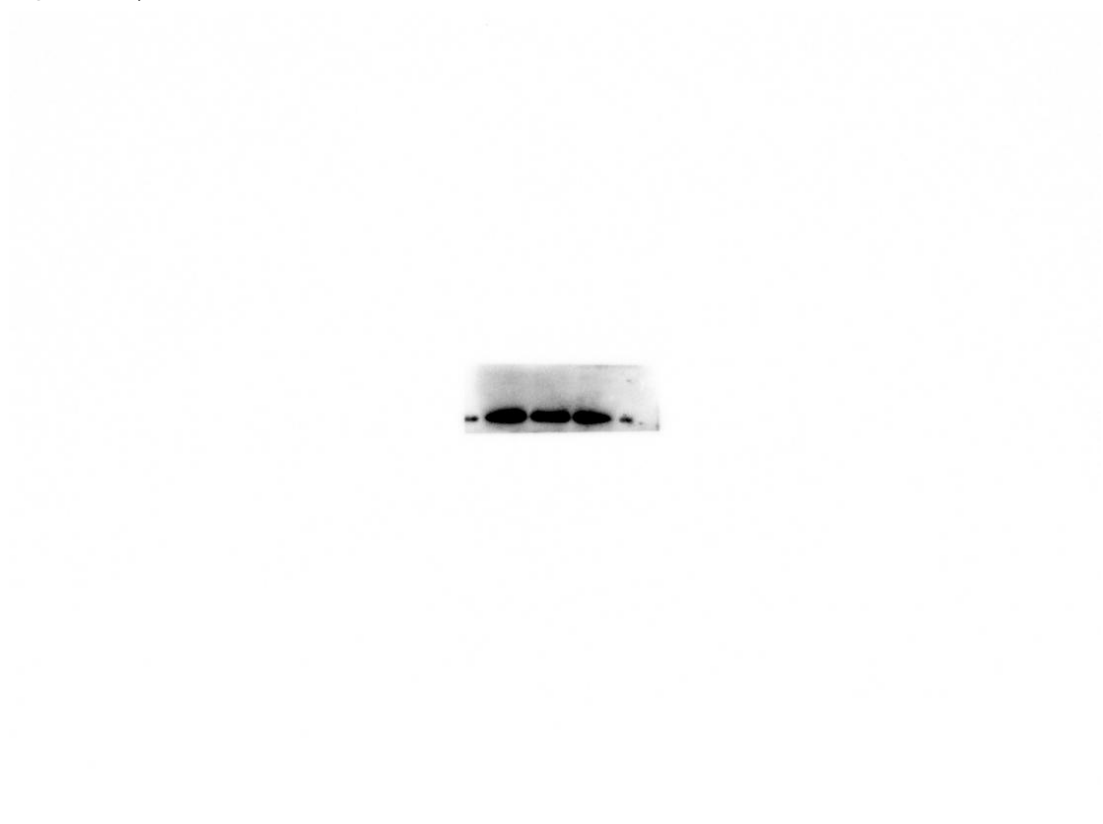

Figure 2L ATP5A1

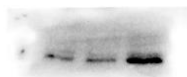

Figure 2L ATP2A2

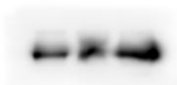

Figure 2L  $\beta$ -actin

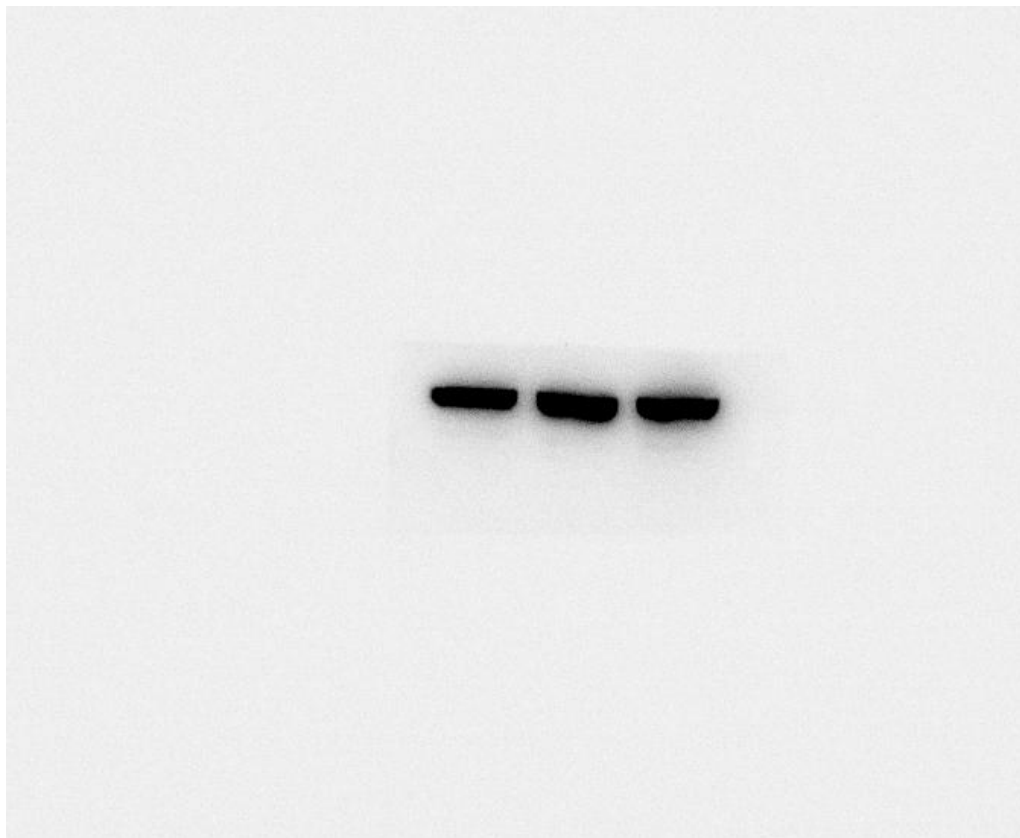

Figure 2V PHB1

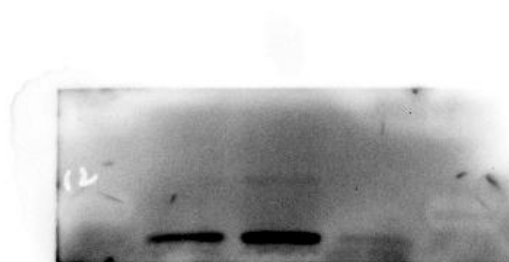

Figure 2V VDAC1

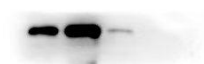

Figure 2V GRP75

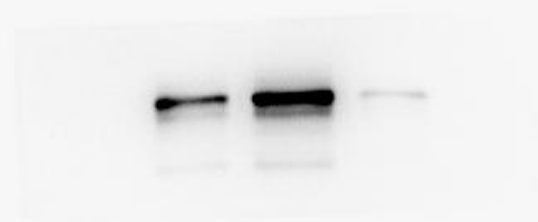



Figure 2V IP3R

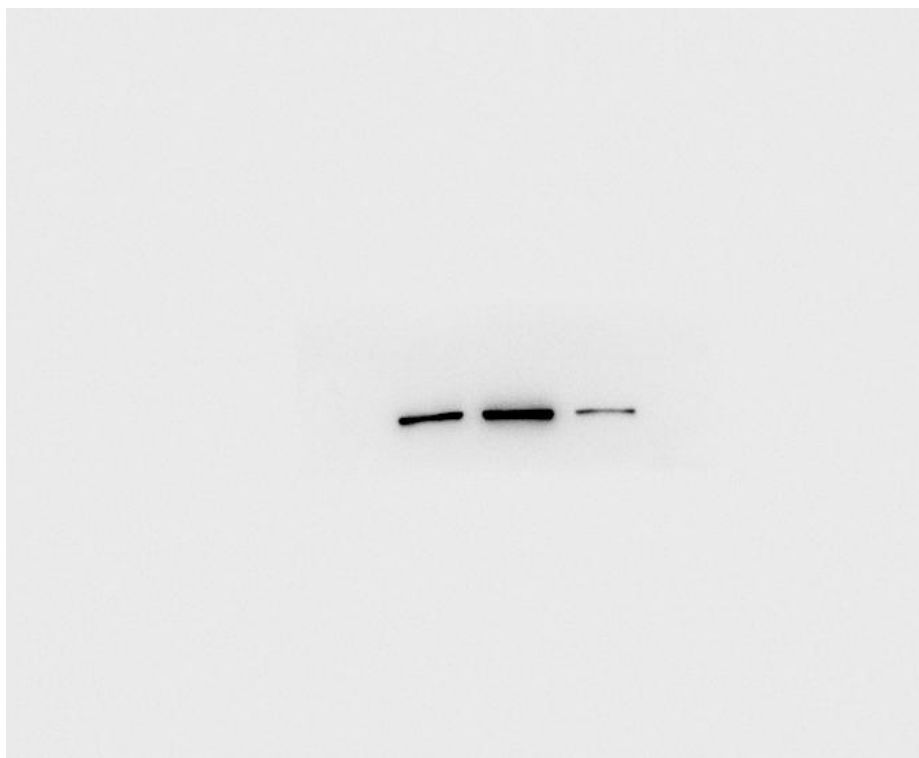

Figure 2V  $\beta$ -actin

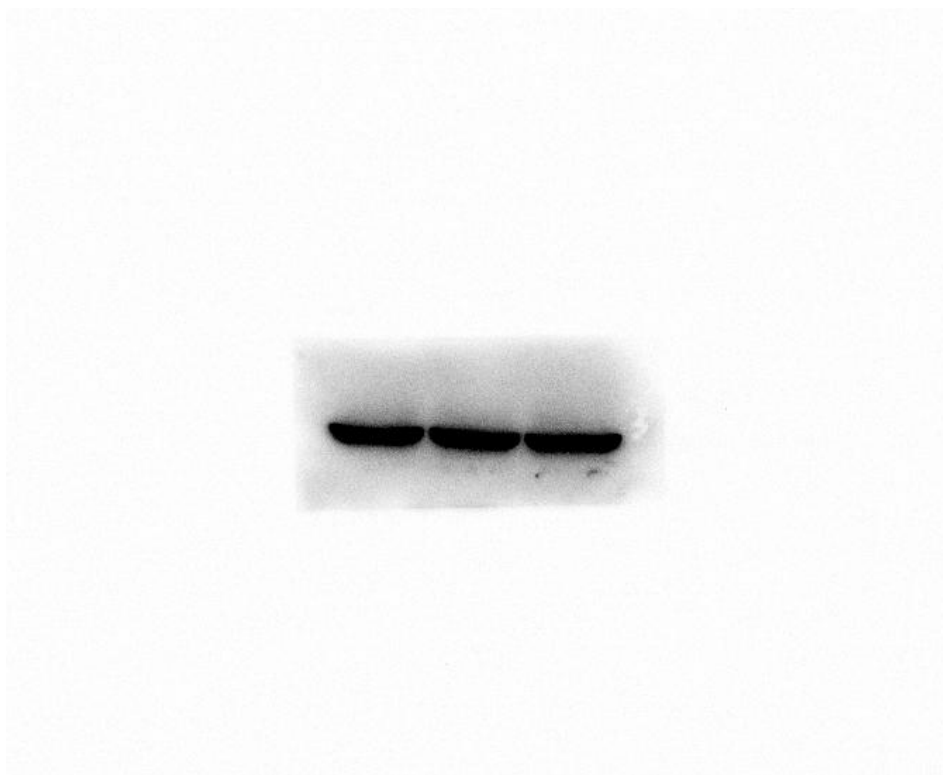

Figure 4A ATP5A1

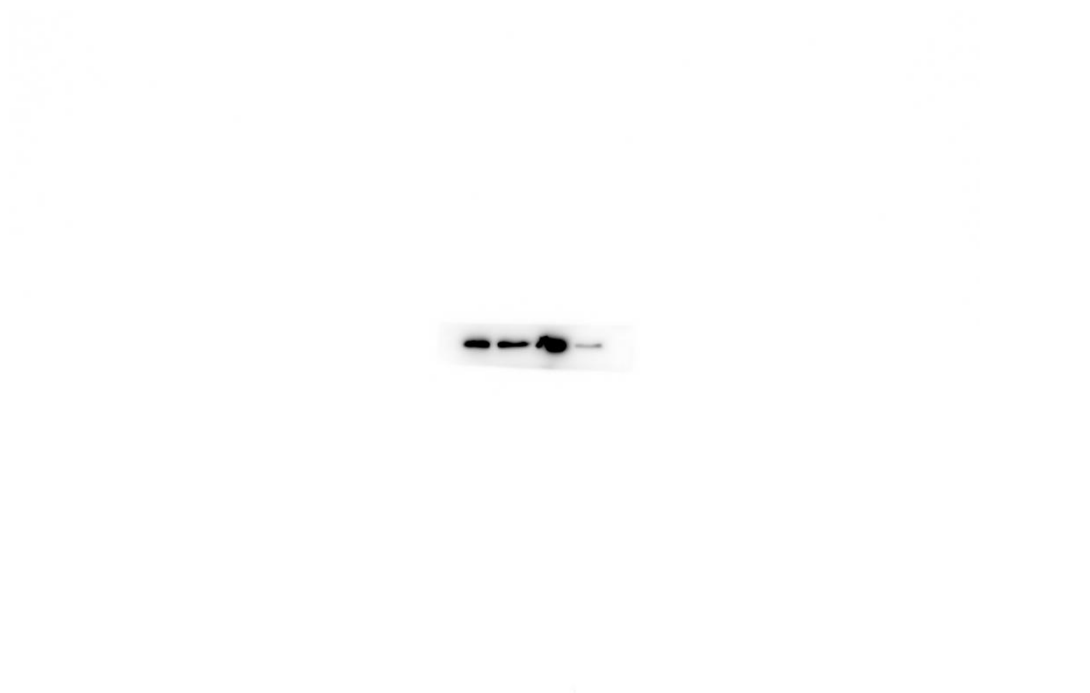

Figure 4A ATP2A2

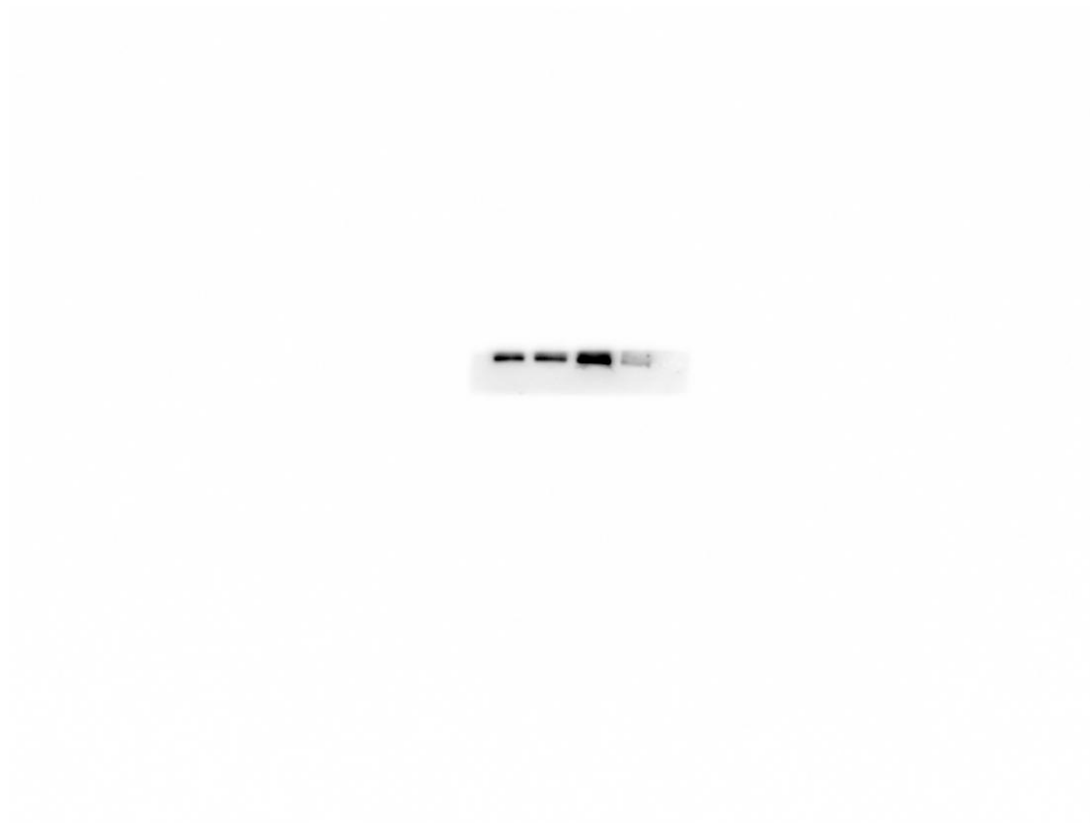

Figure 4A  $\beta$ -actin

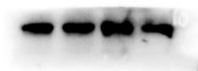

Figure 4C ATP5A1

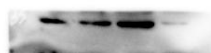

Figure 4C ATP2A2

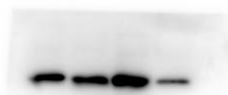

Figure 4C  $\beta$ -actin

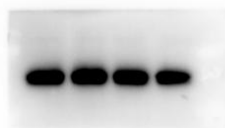

Figure 4N PHB1

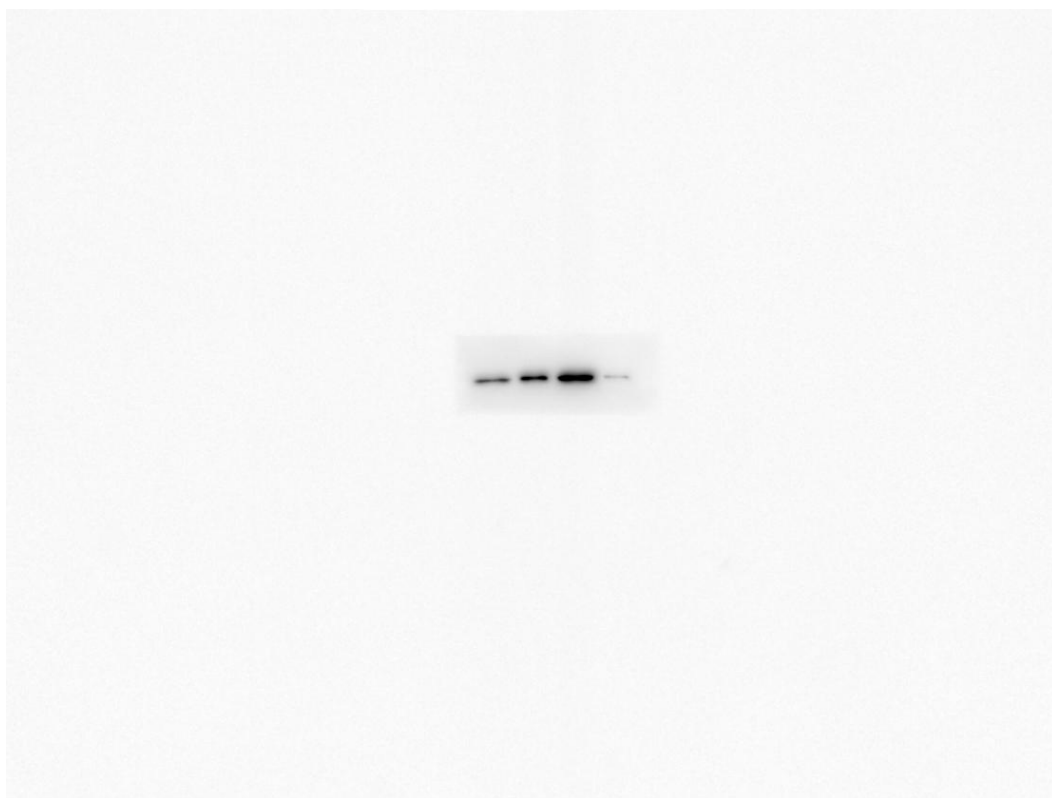

Figure 4N VDAC1

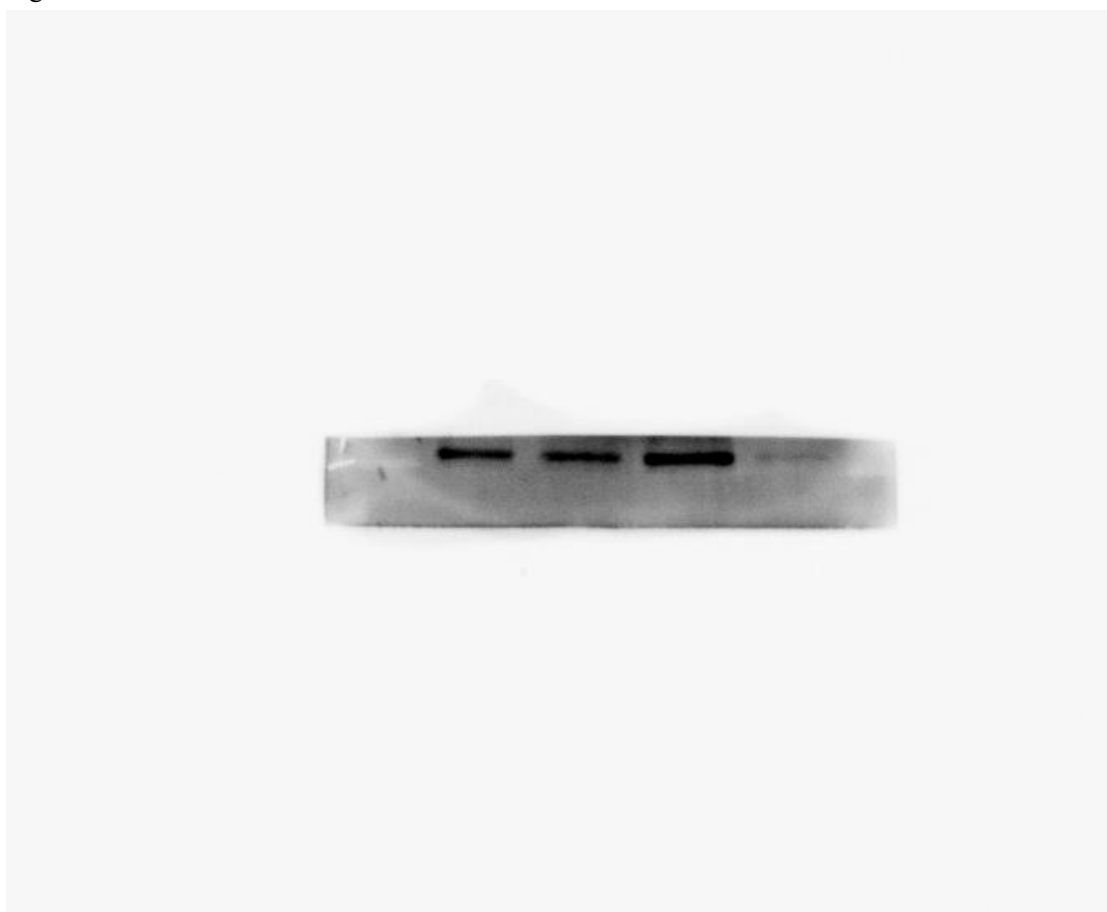

Figure 4N GRP75

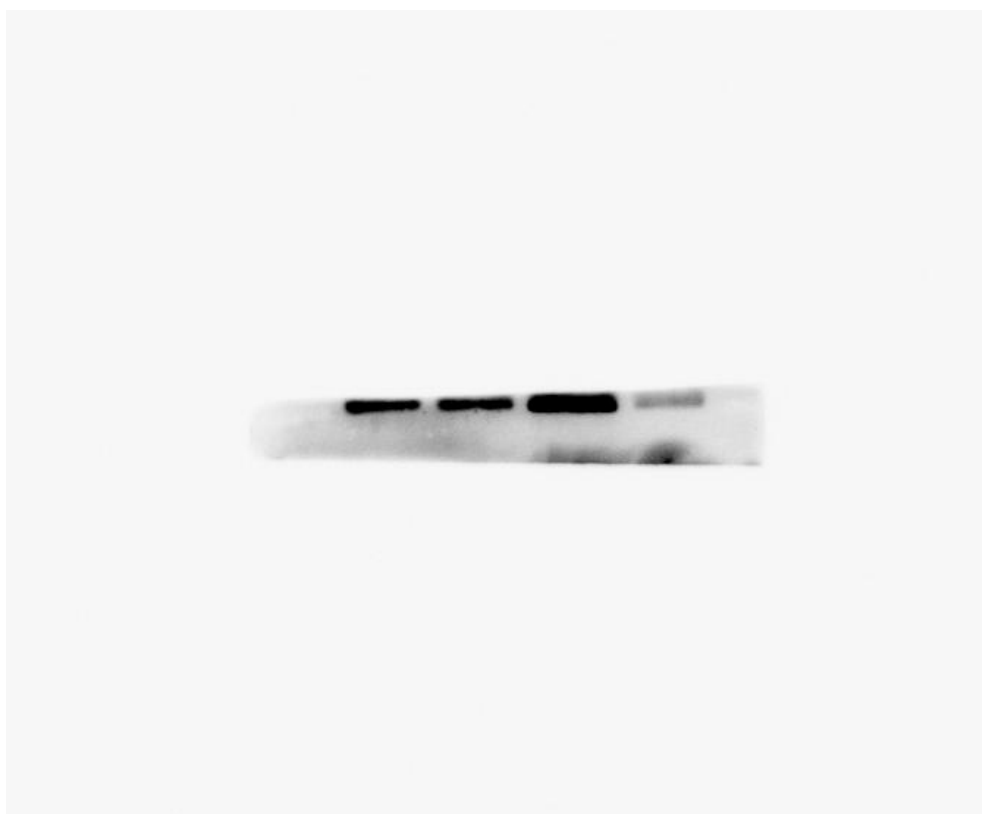

Figure 4N IP3R

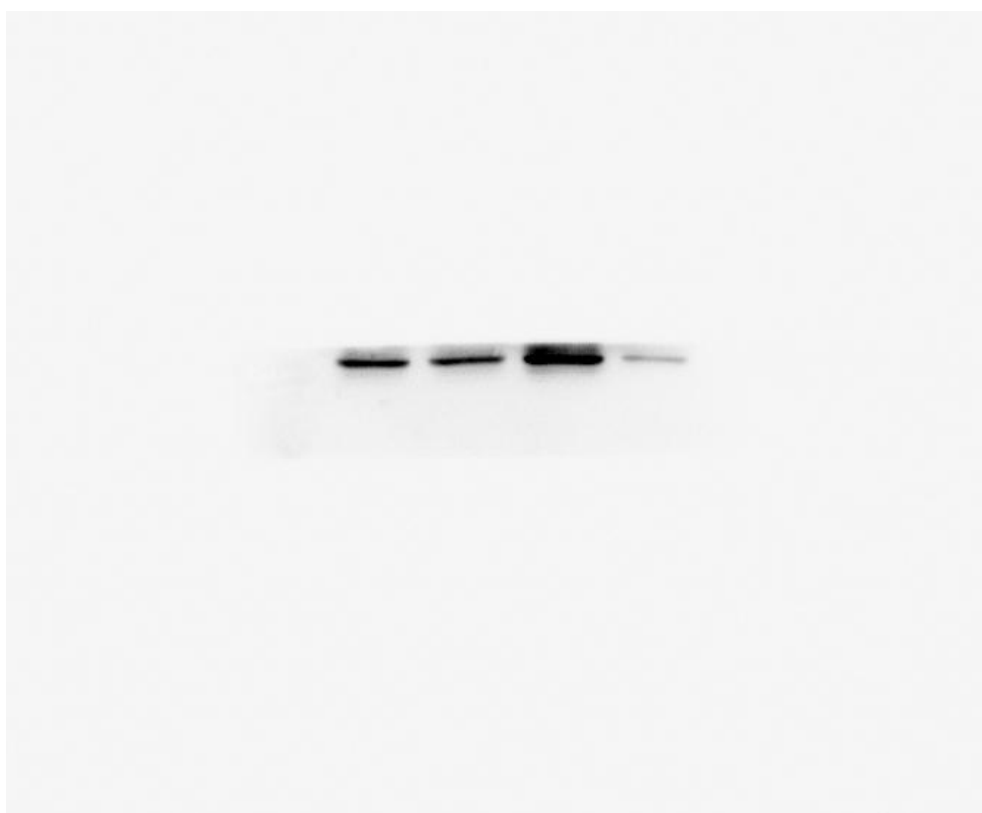

Figure 4N  $\beta$ -actin

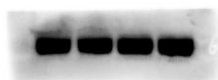

Figure 4O PHB1

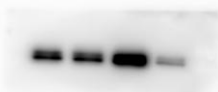

Figure 4O VDAC1

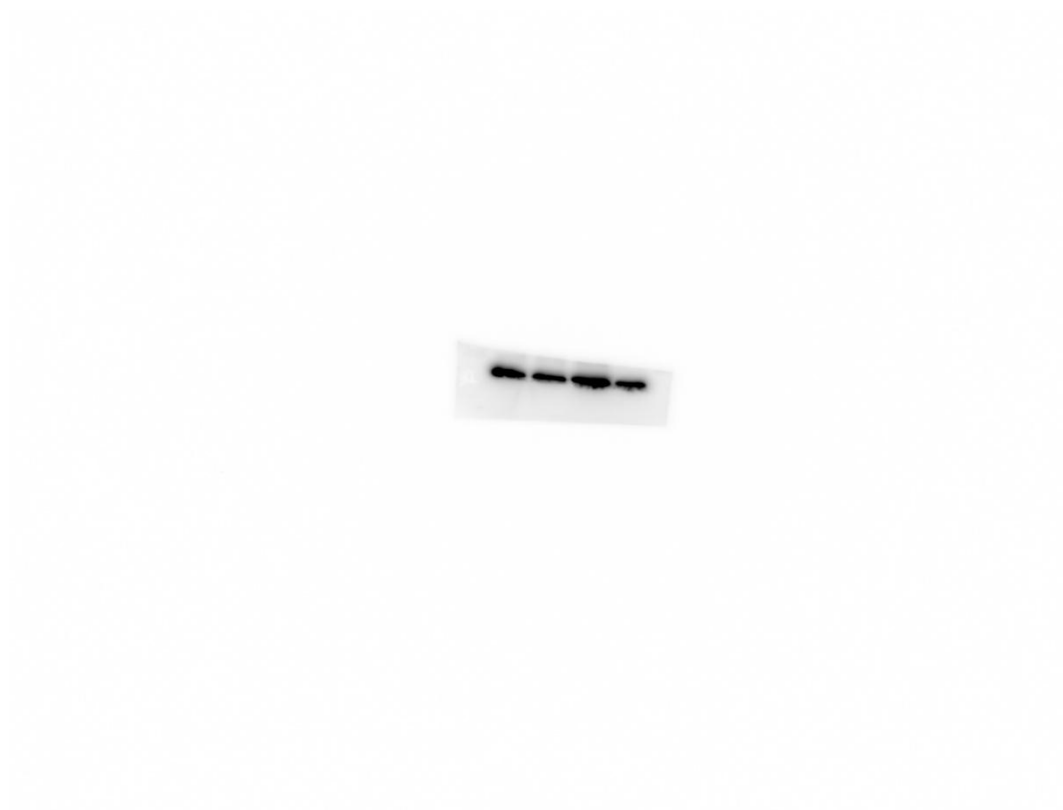

Figure 4O GRP75

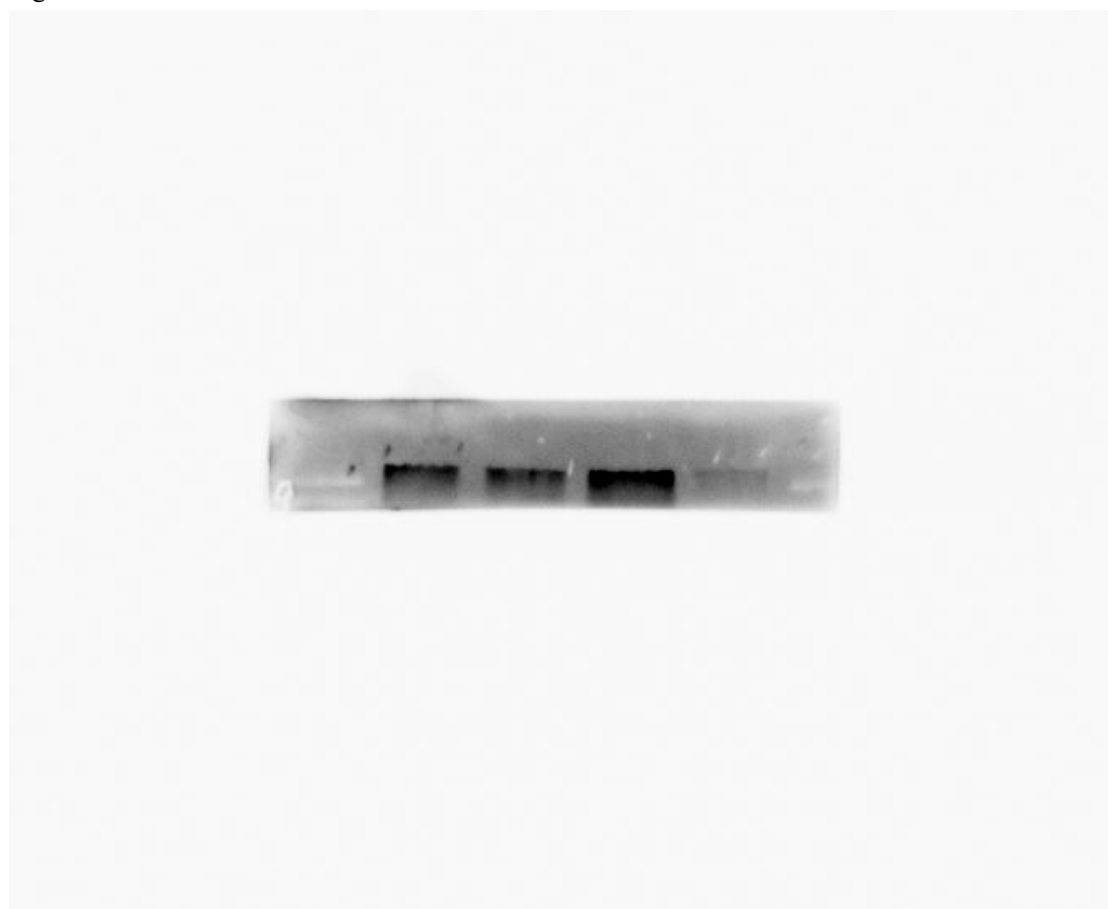



Figure 4O IP3R

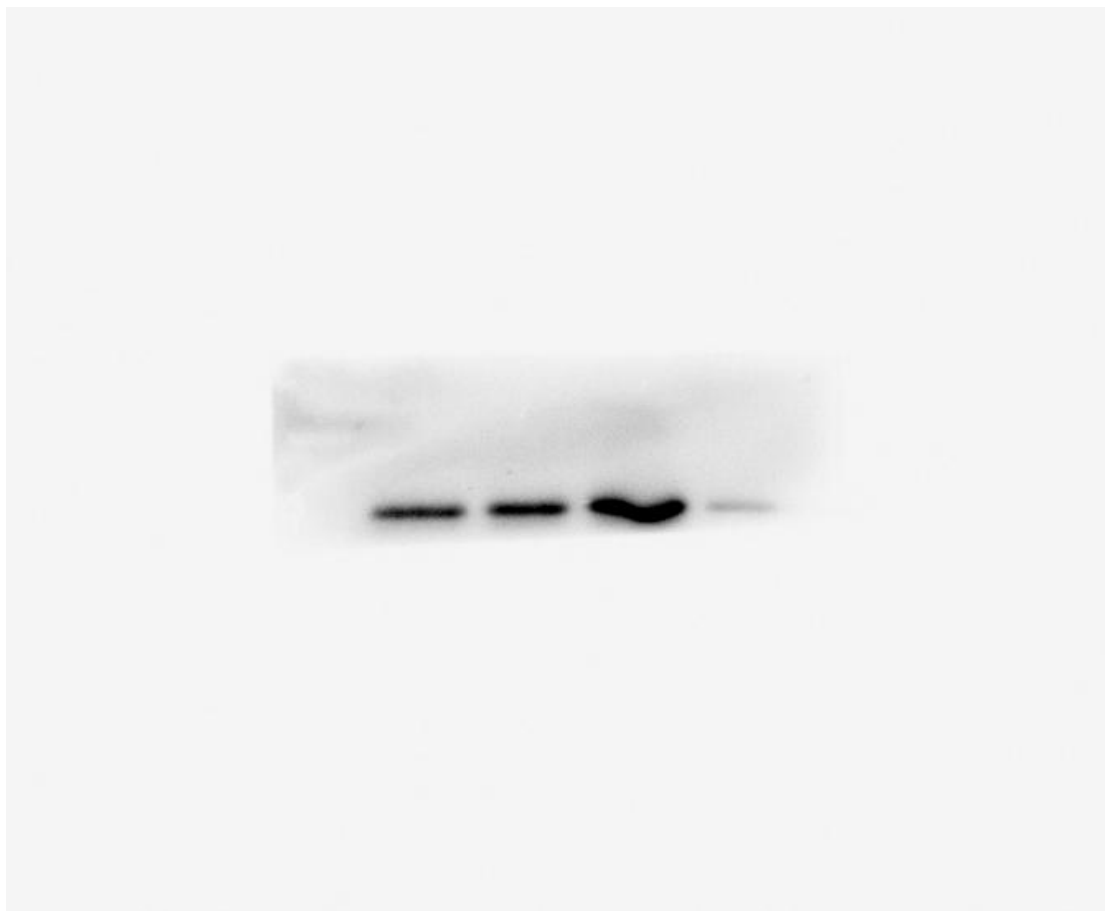

Figure 4O  $\beta$ -actin

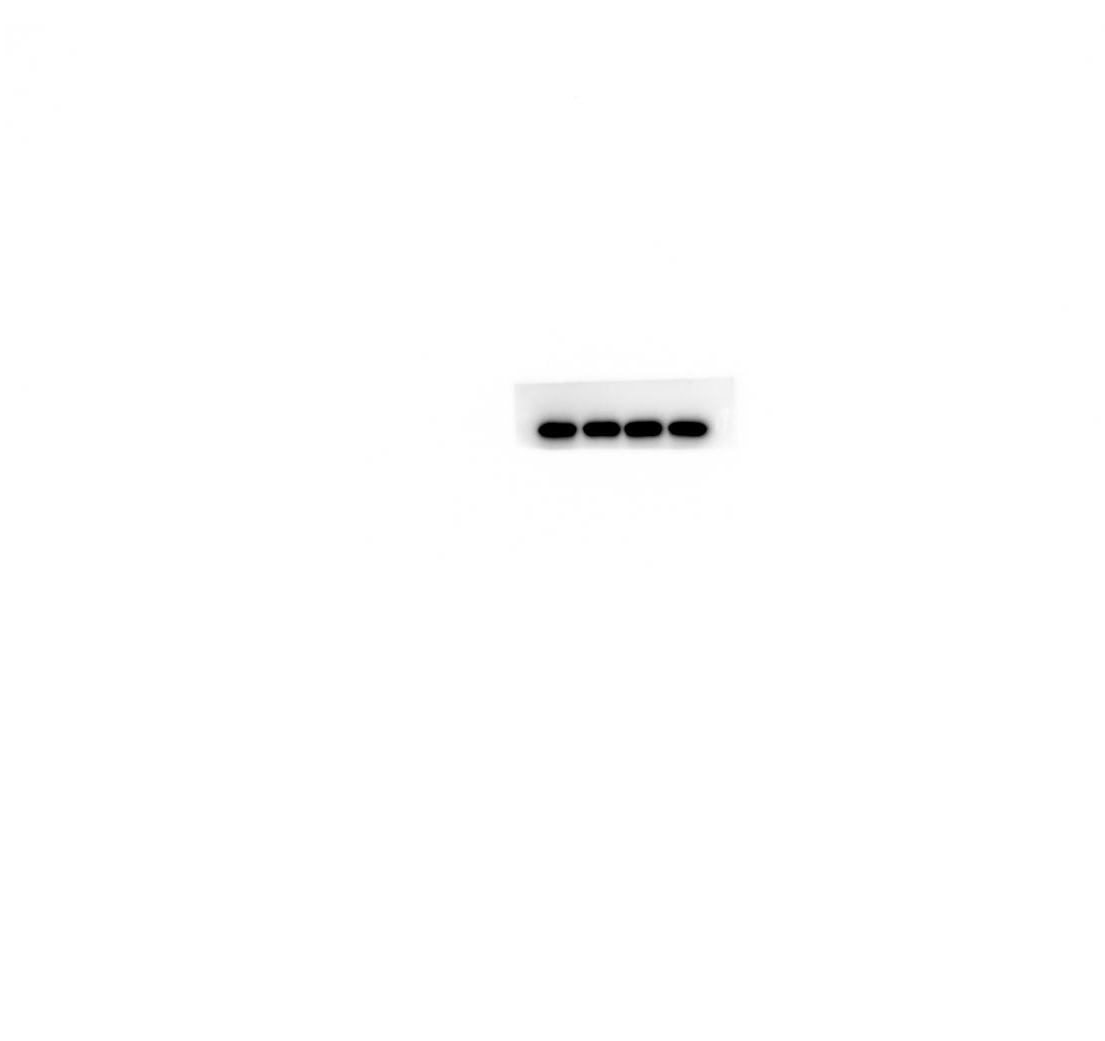

Figure 4R PHB1

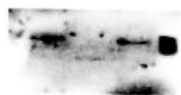

Figure 4R VDAC1

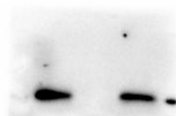

Figure 4S VDAC1

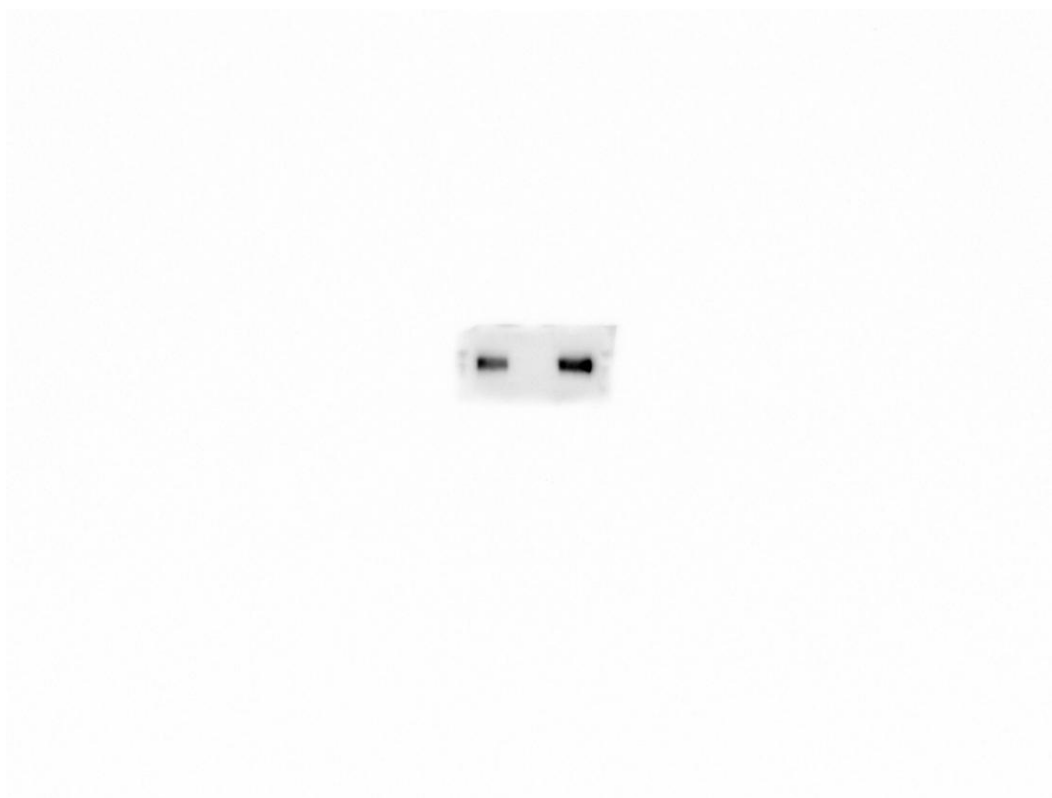

Figure 4S GRP75

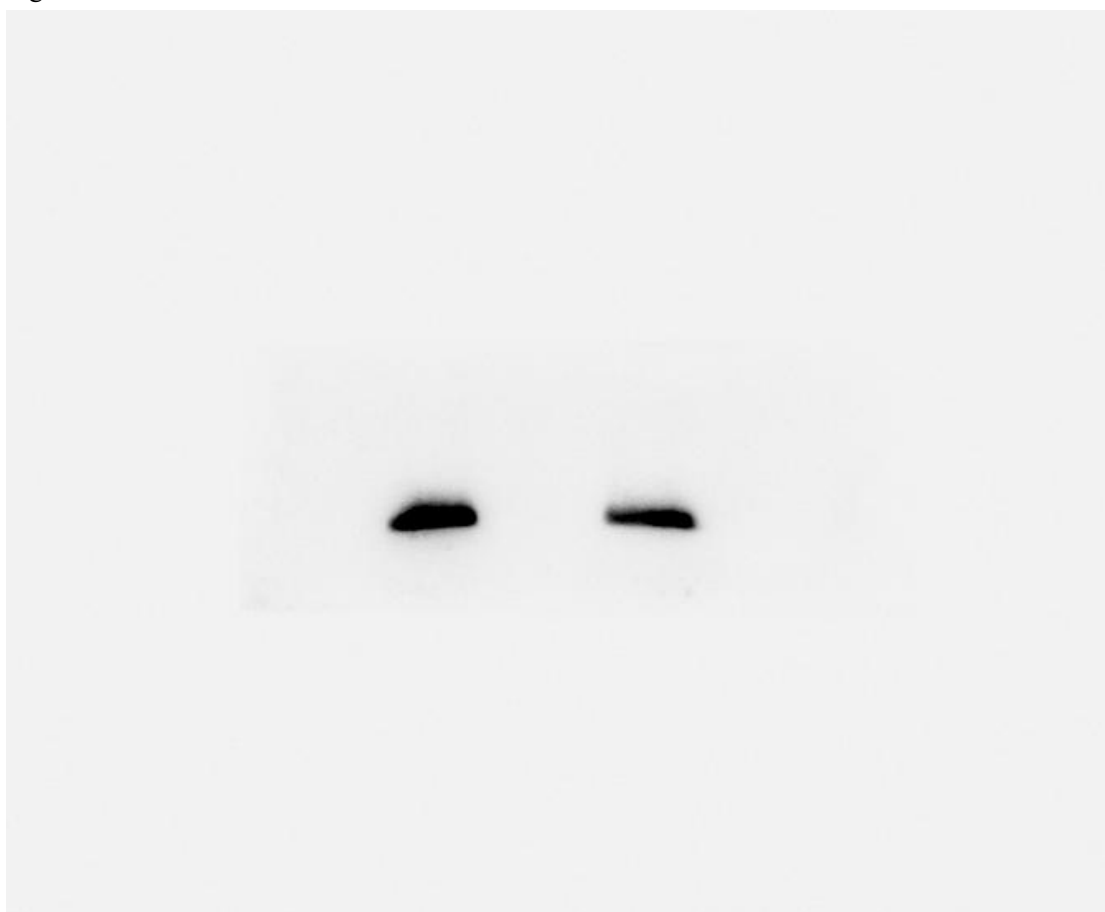

Figure 4T GRP75

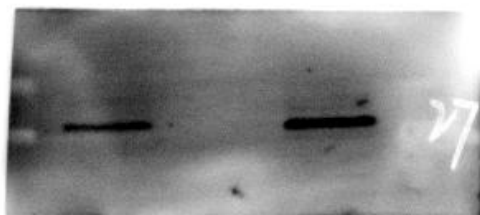

Figure 4T IP3R

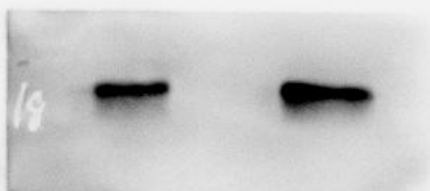

Figure 4U PHB1

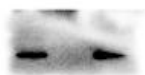

Figure 4U VDAC1

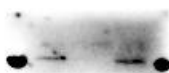

Figure 4V VDAC1

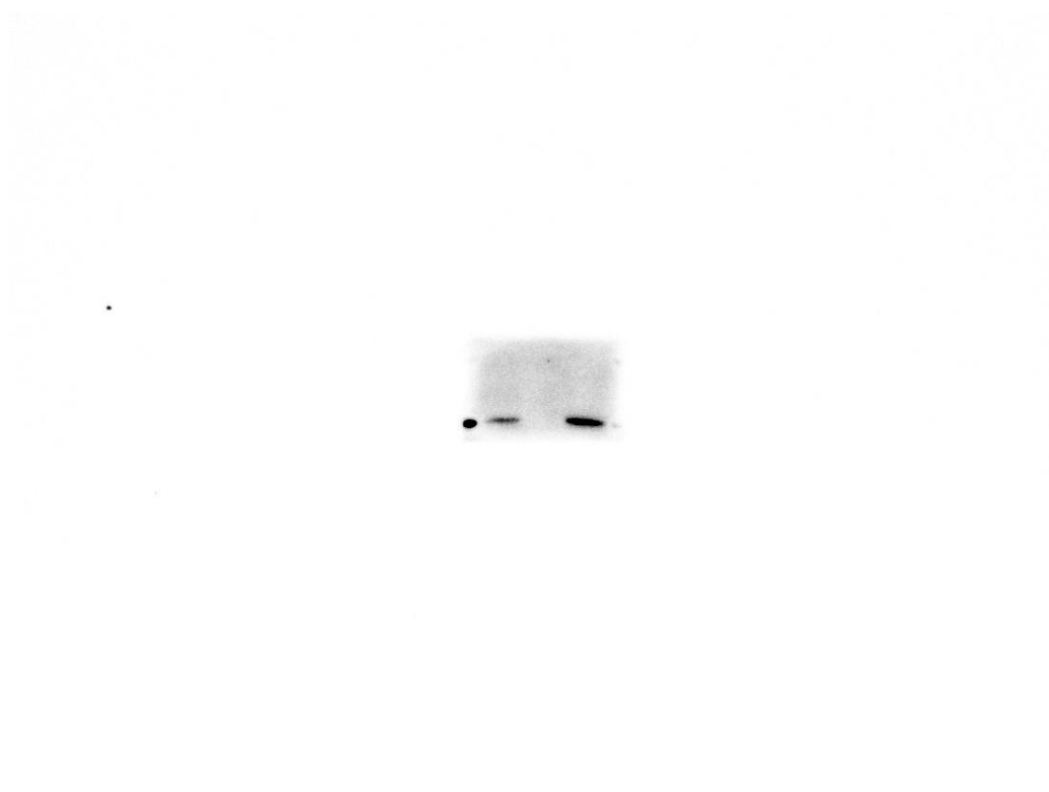

Figure 4V GRP75

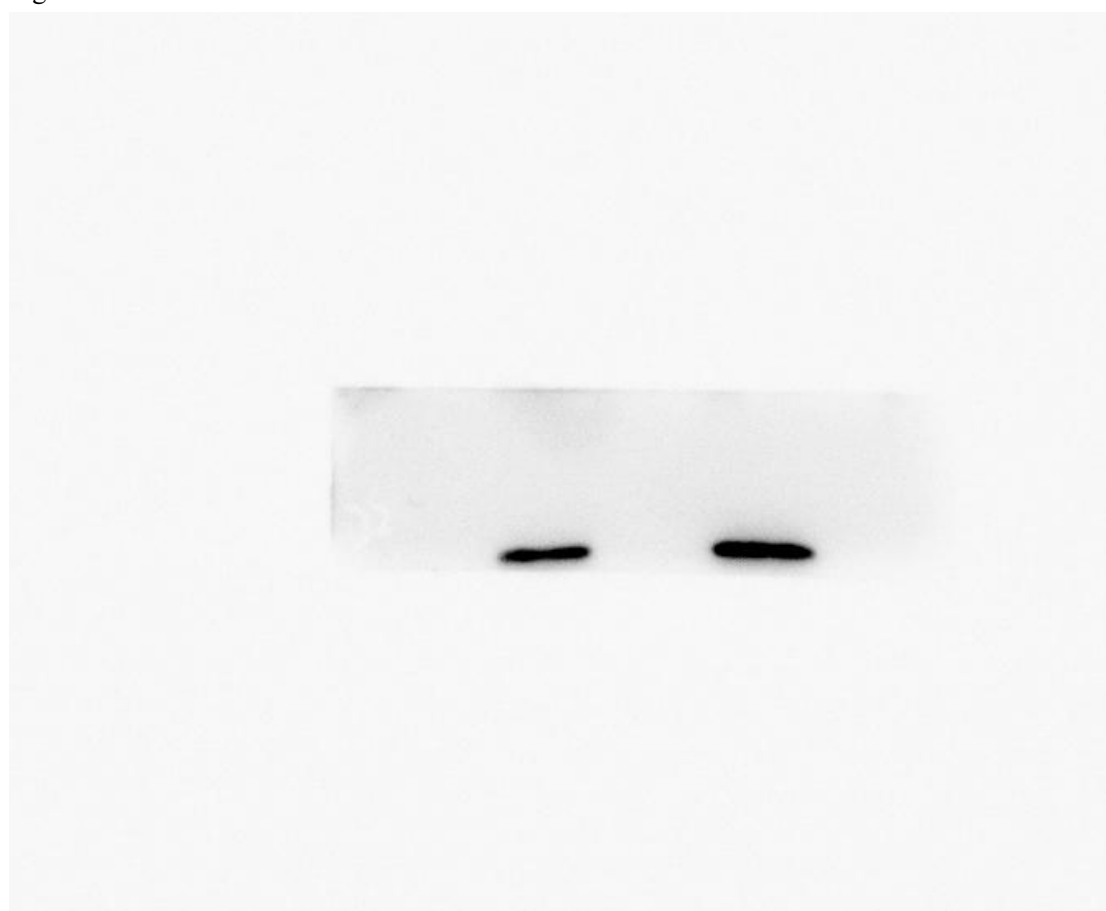

Figure 4W GRP75

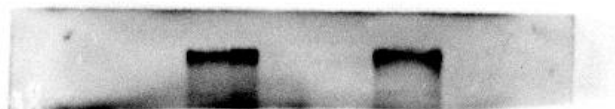

Figure 4W IP3R

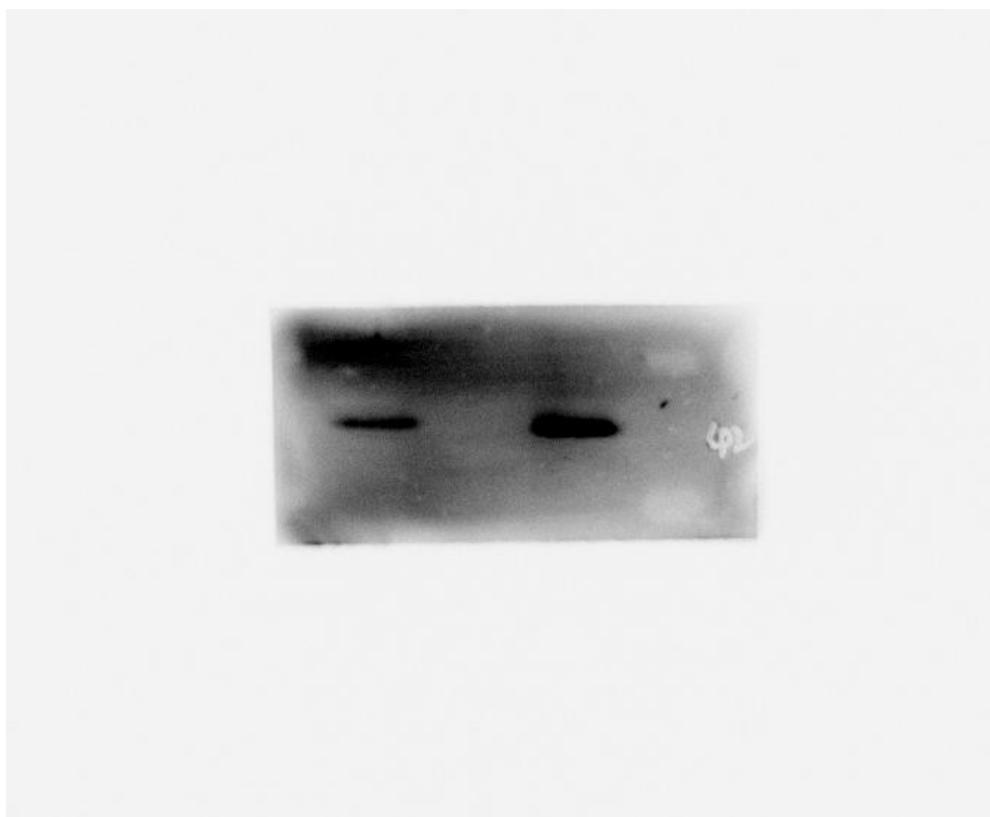

Figure 4X PHB1

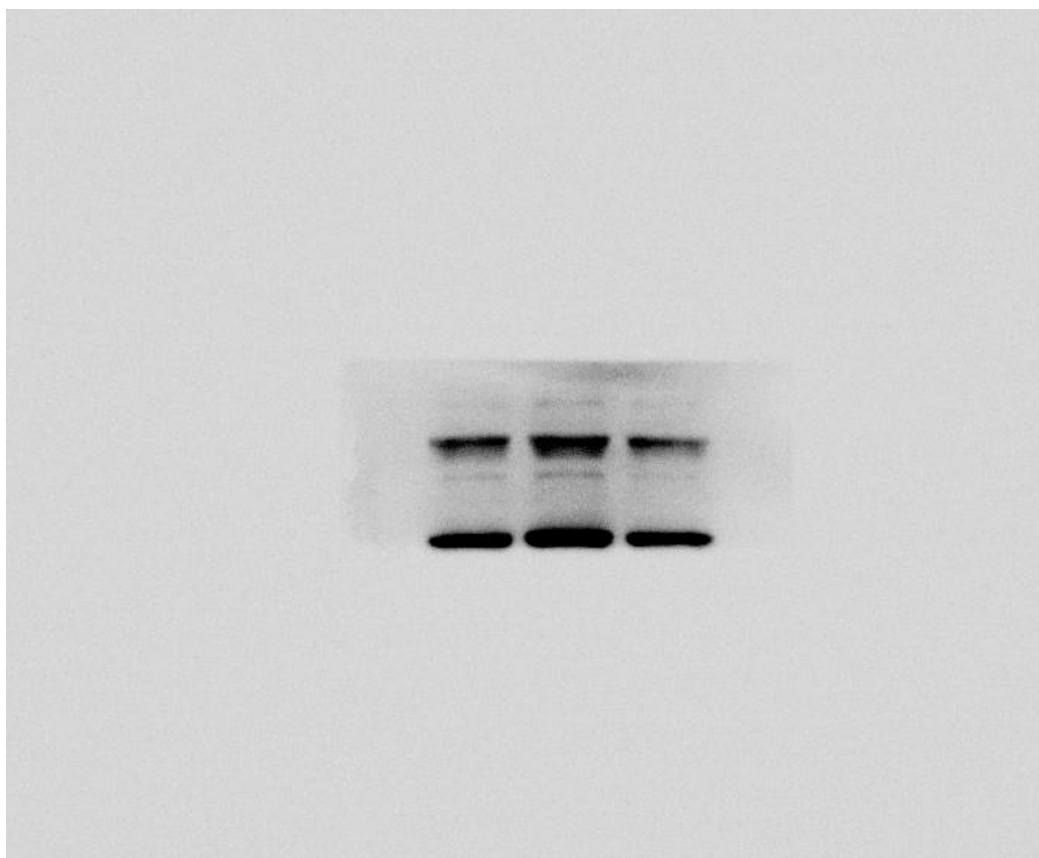

Figure 4X VDAC1

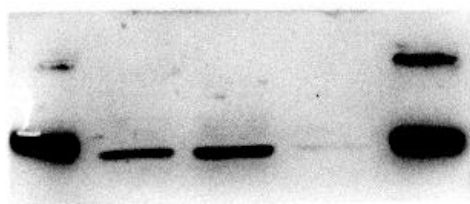



Figure 4X GRP75

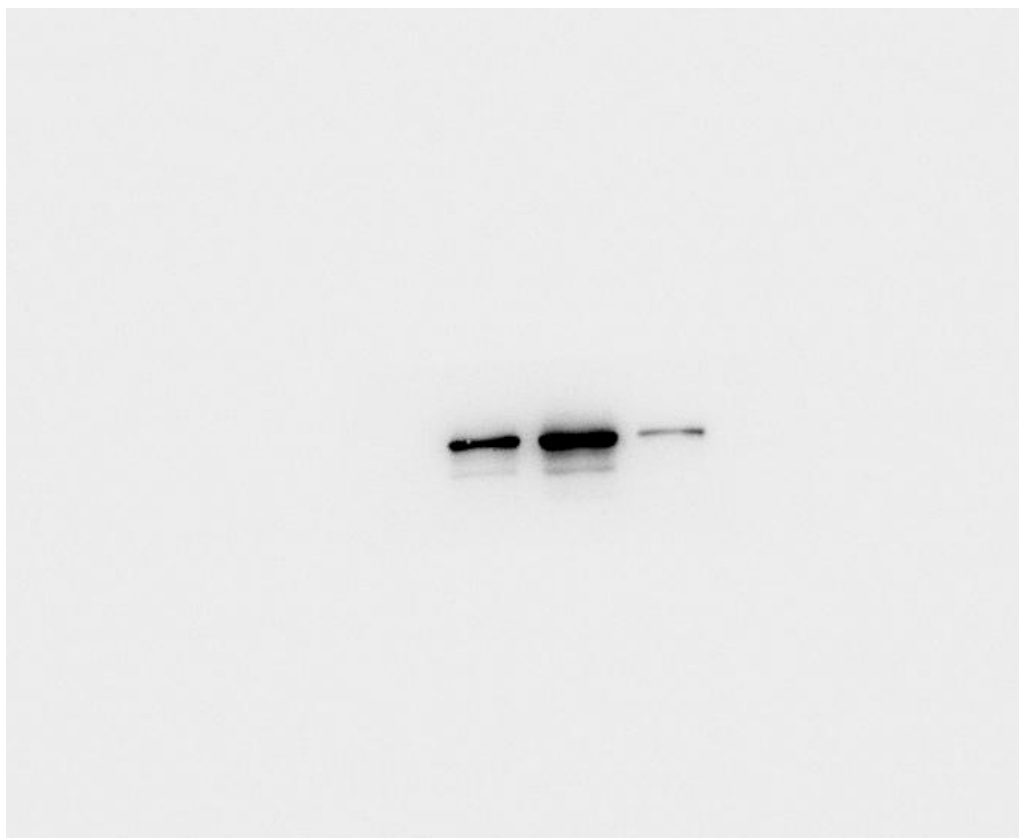

Figure 4X IP3R

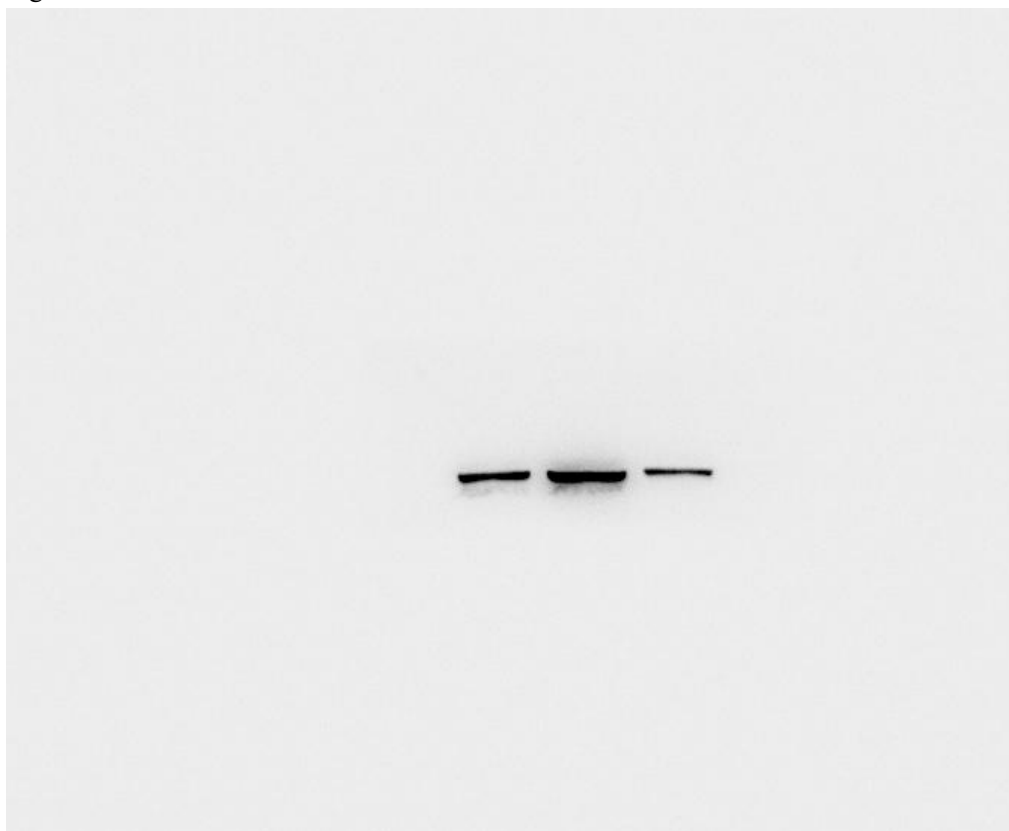

Figure 4X  $\beta$ -actin

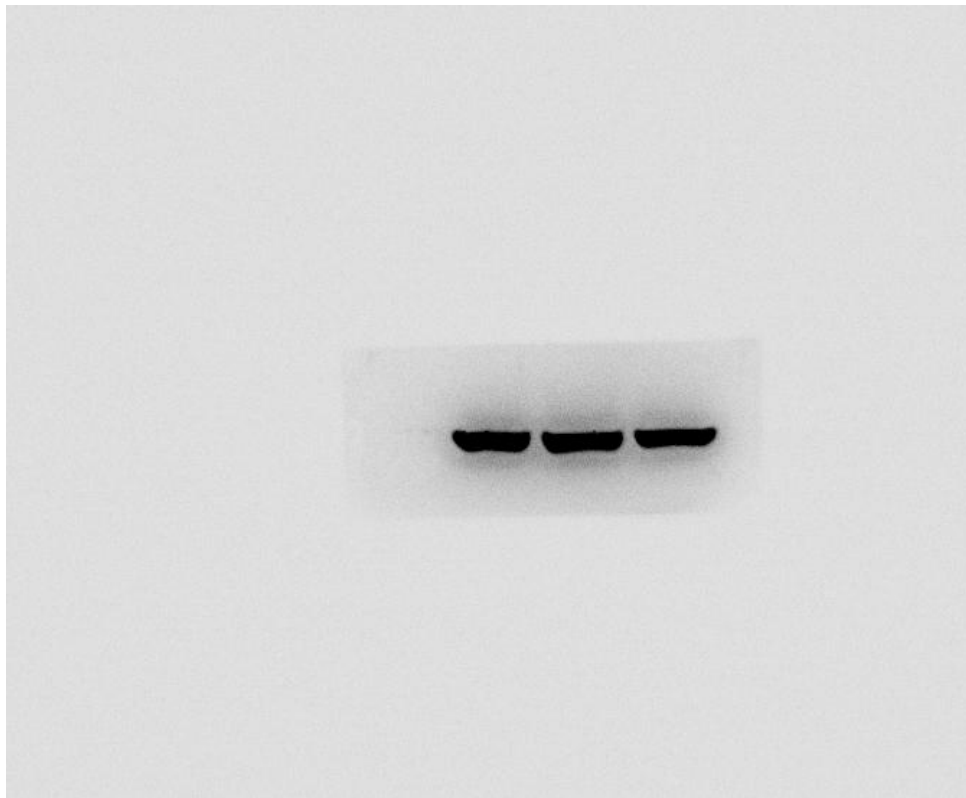

Figure 4Z PHB1

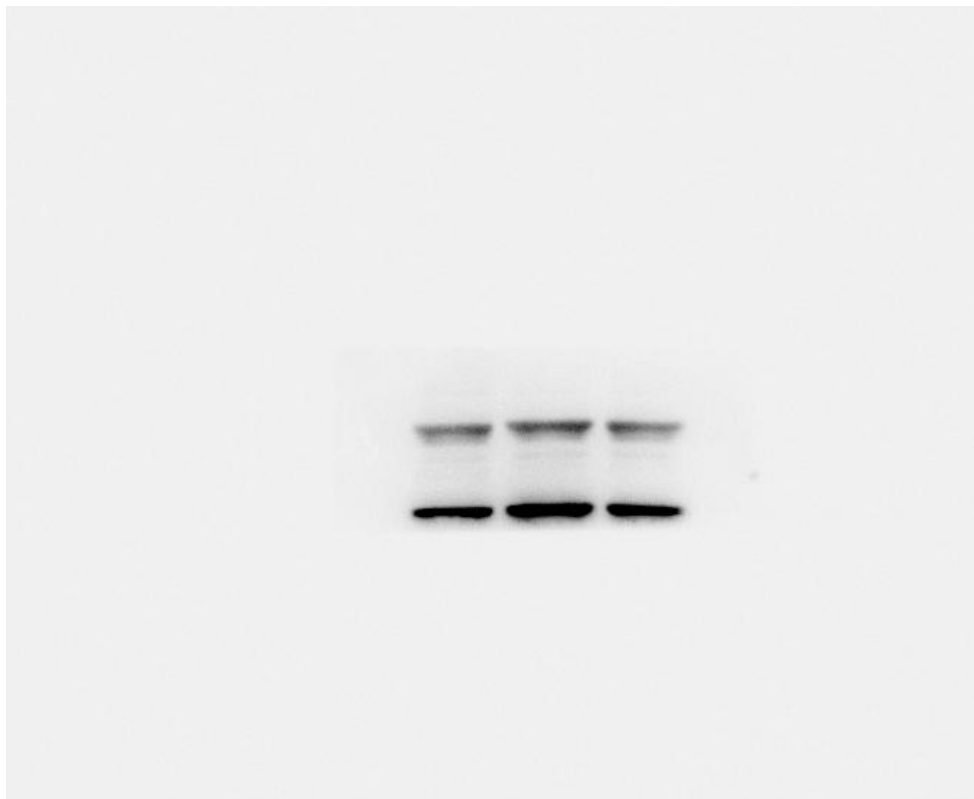

Figure 4Z VDAC1

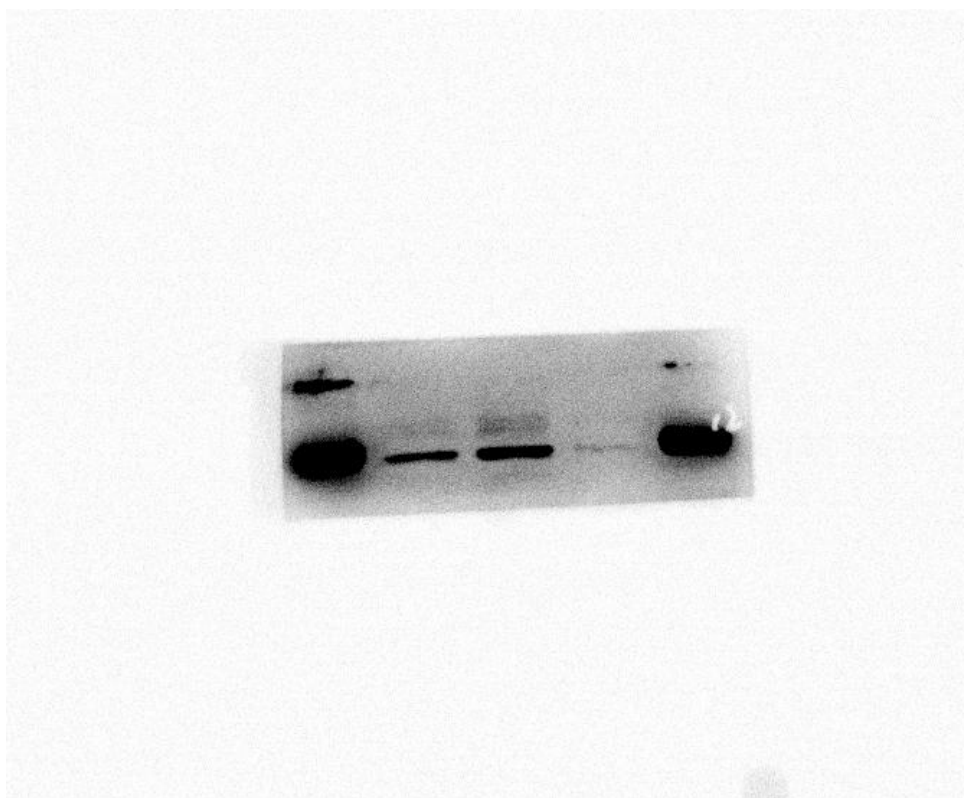

Figure 4Z GRP75

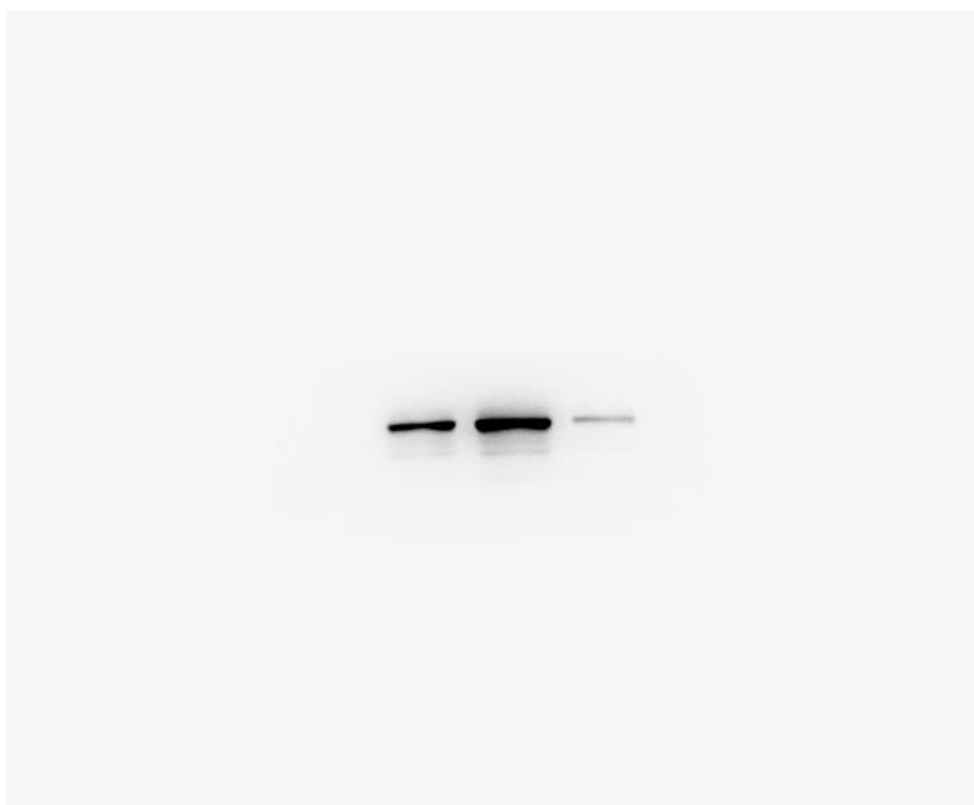

Figure 4Z IP3R

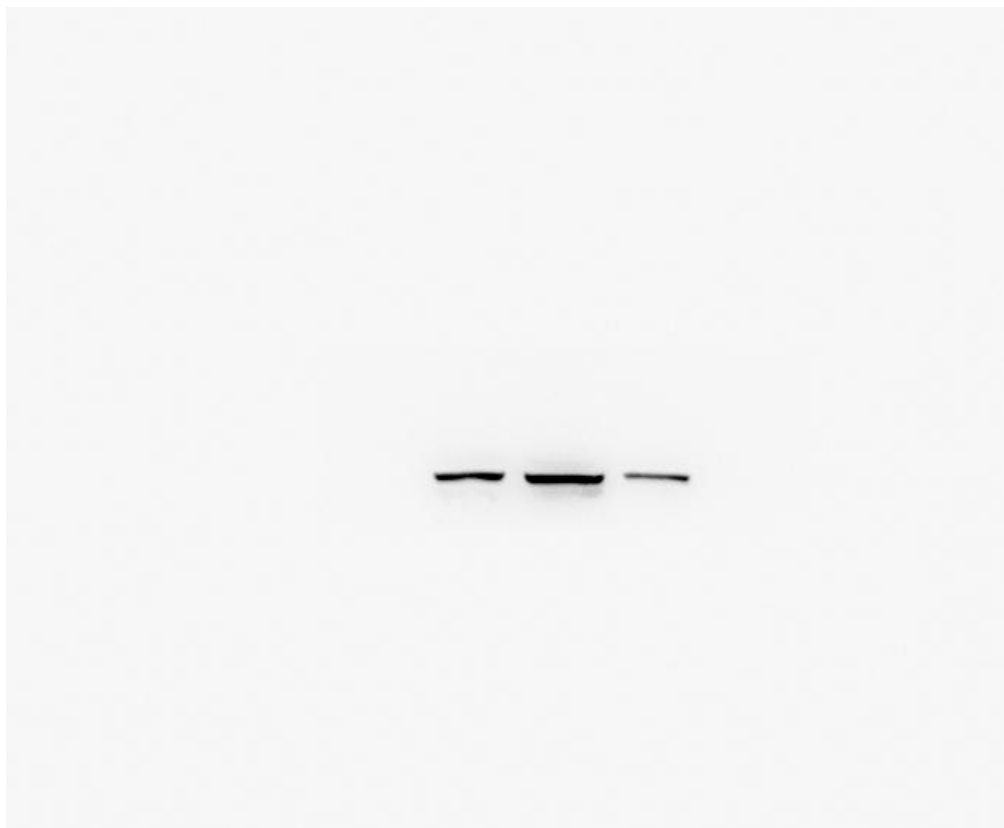

Figure 4Z  $\beta$ -actin

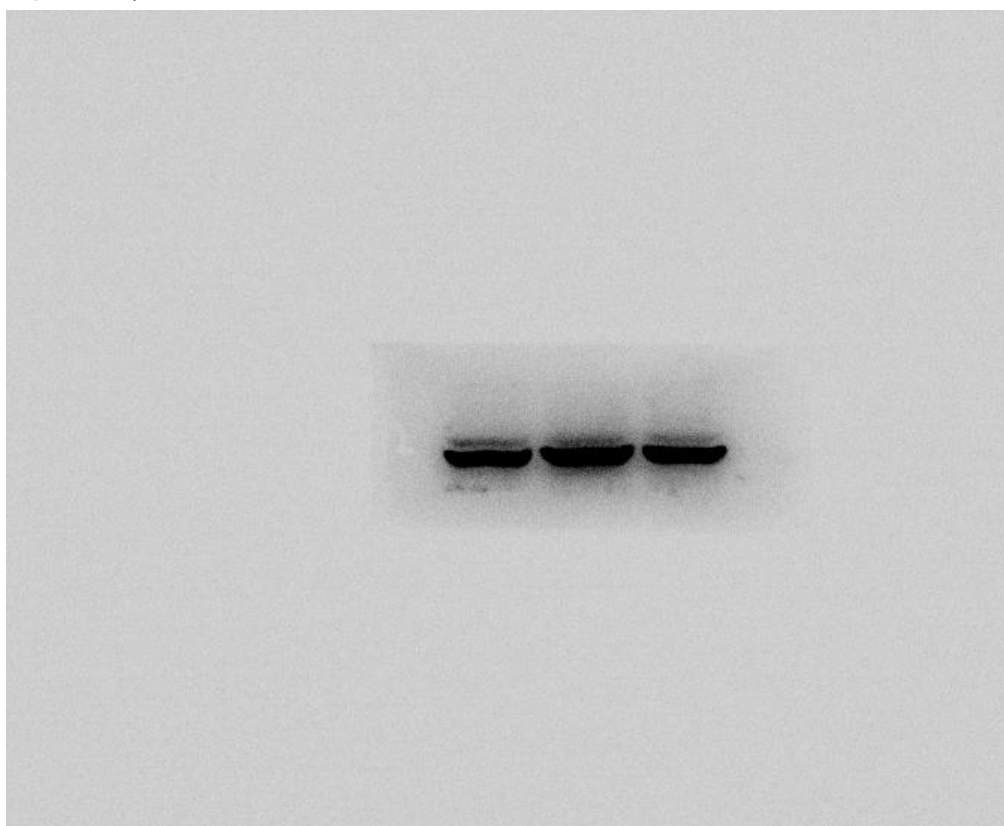

Figure 5E PHB1

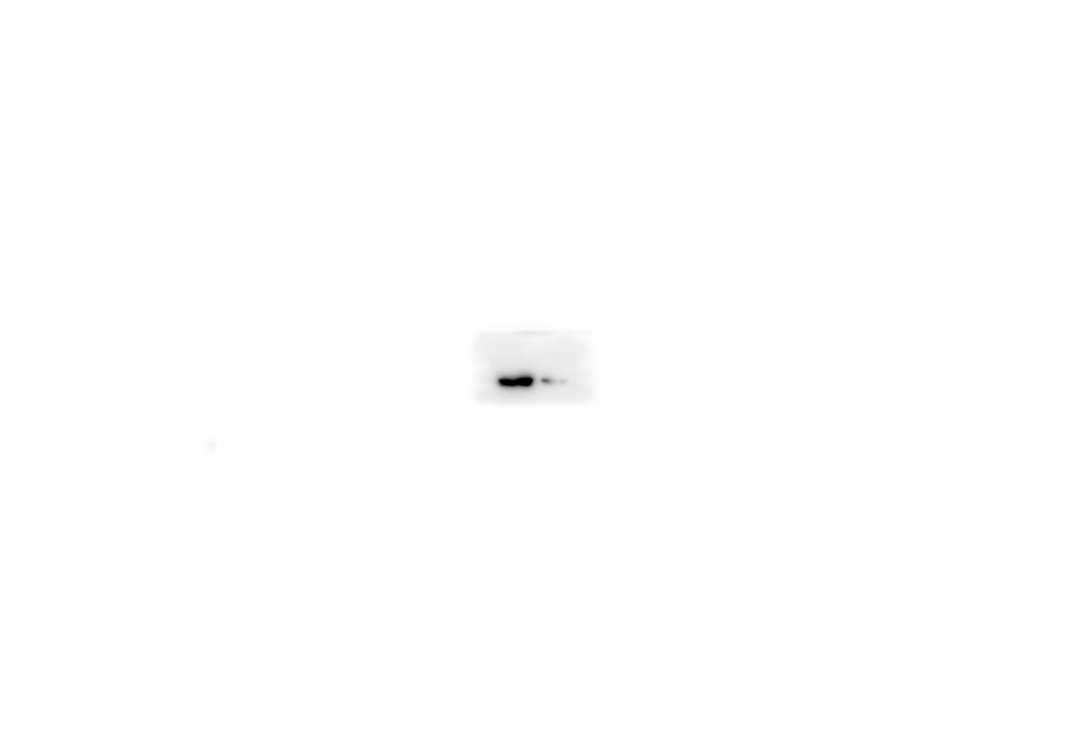

Figure 5E VDAC1

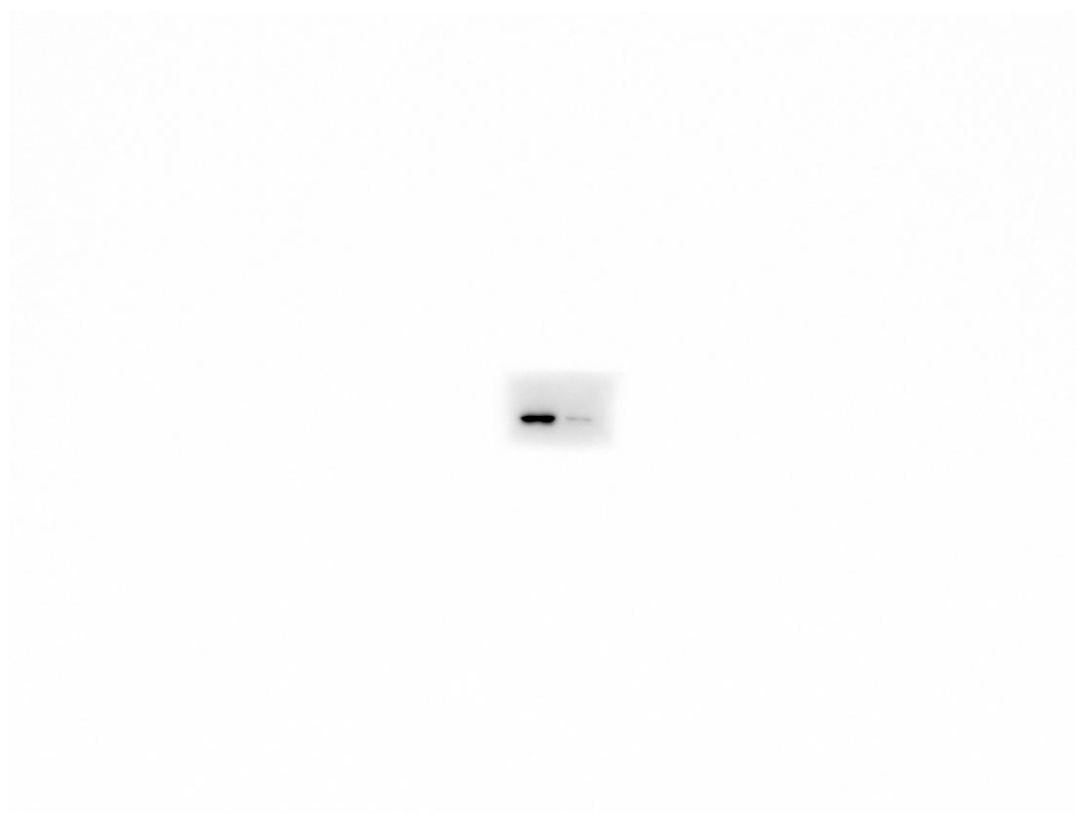

Figure 5E GRP75

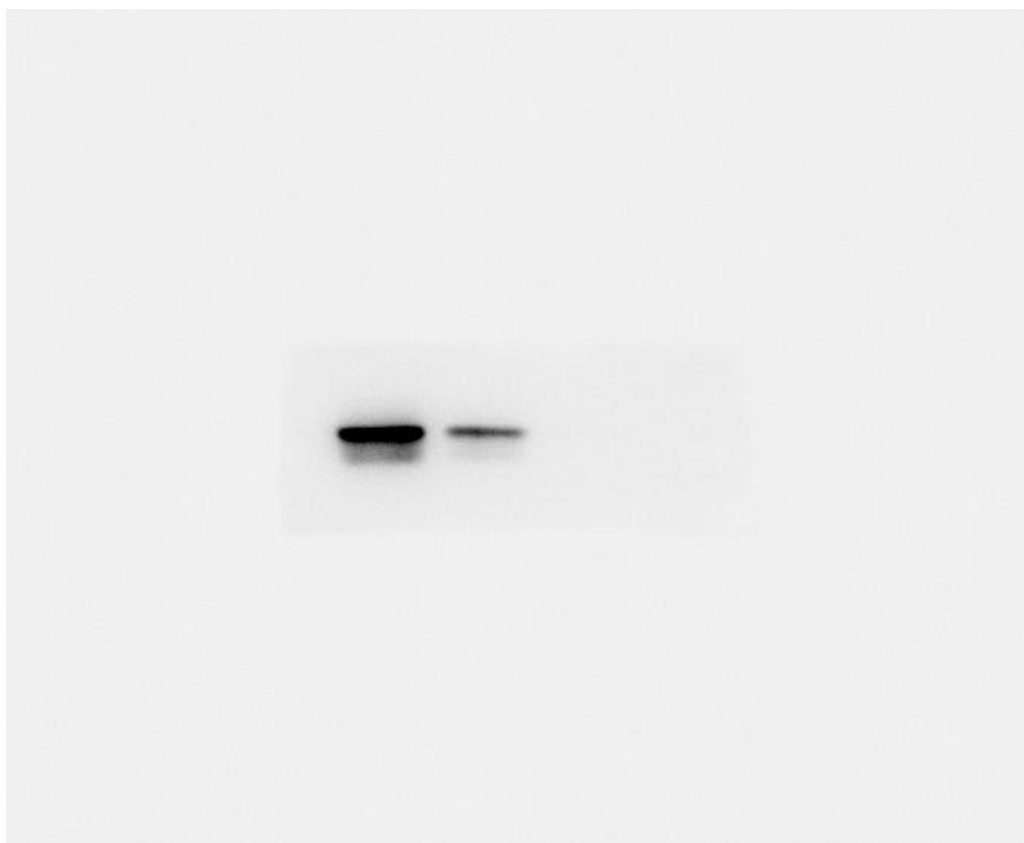

Figure 5E IP3R

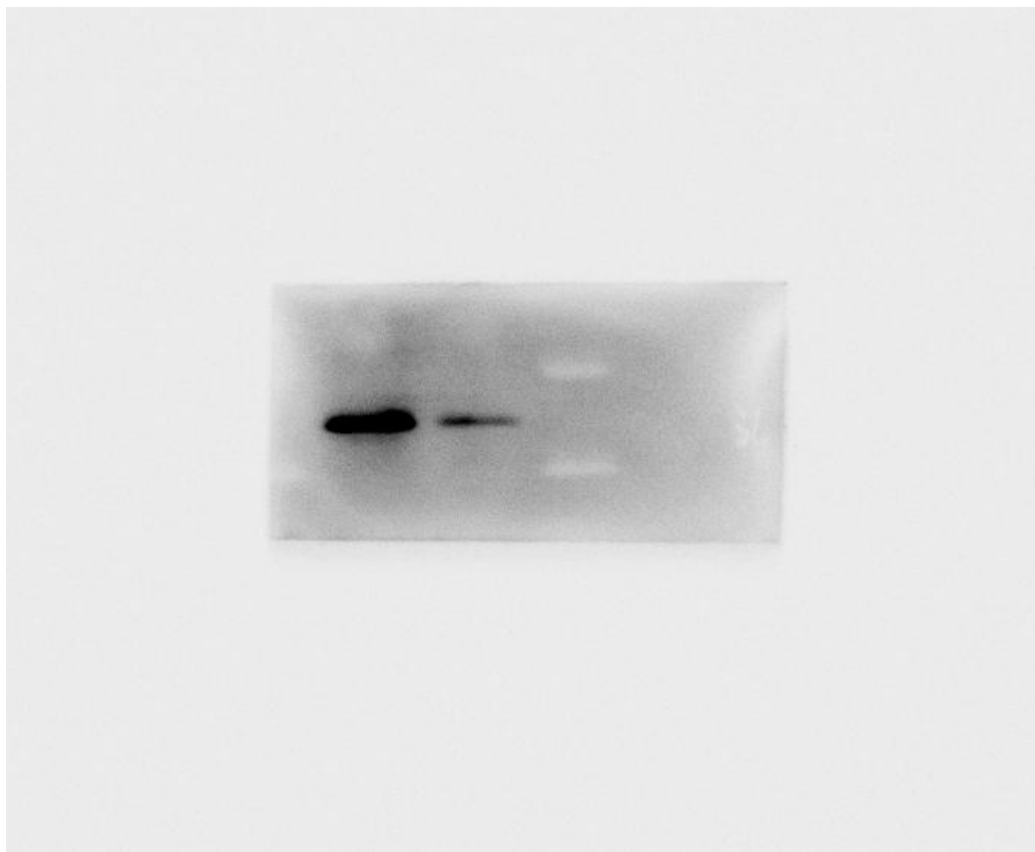

Figure 5E ATP5A1

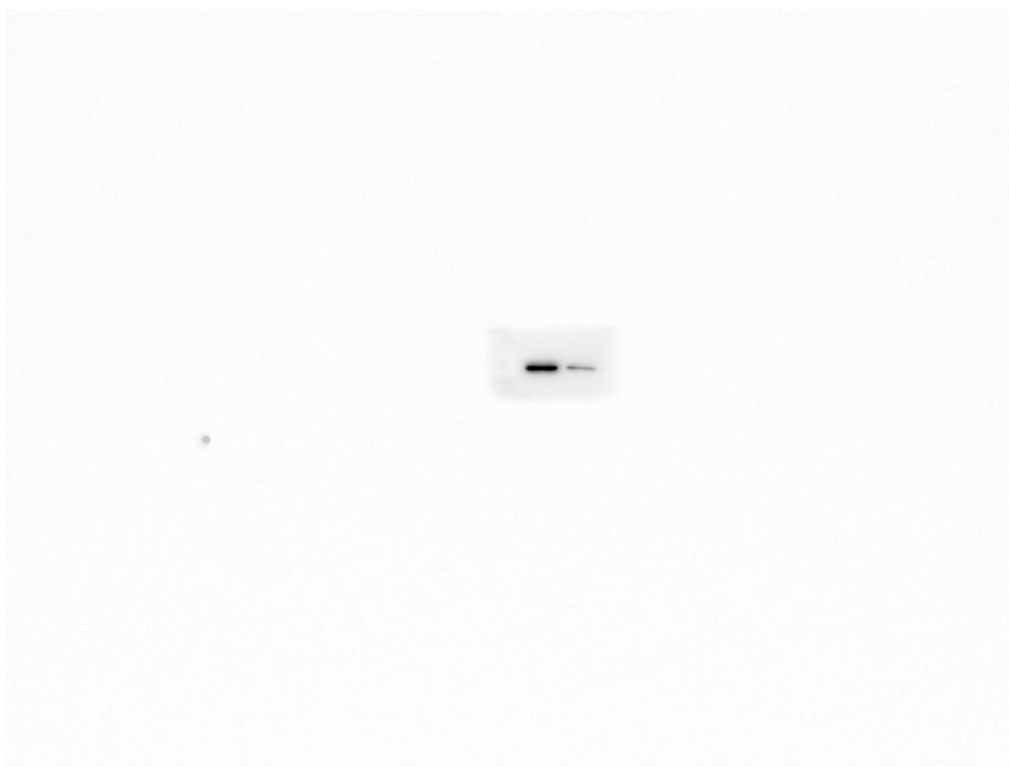

Figure 5E ATP2A2

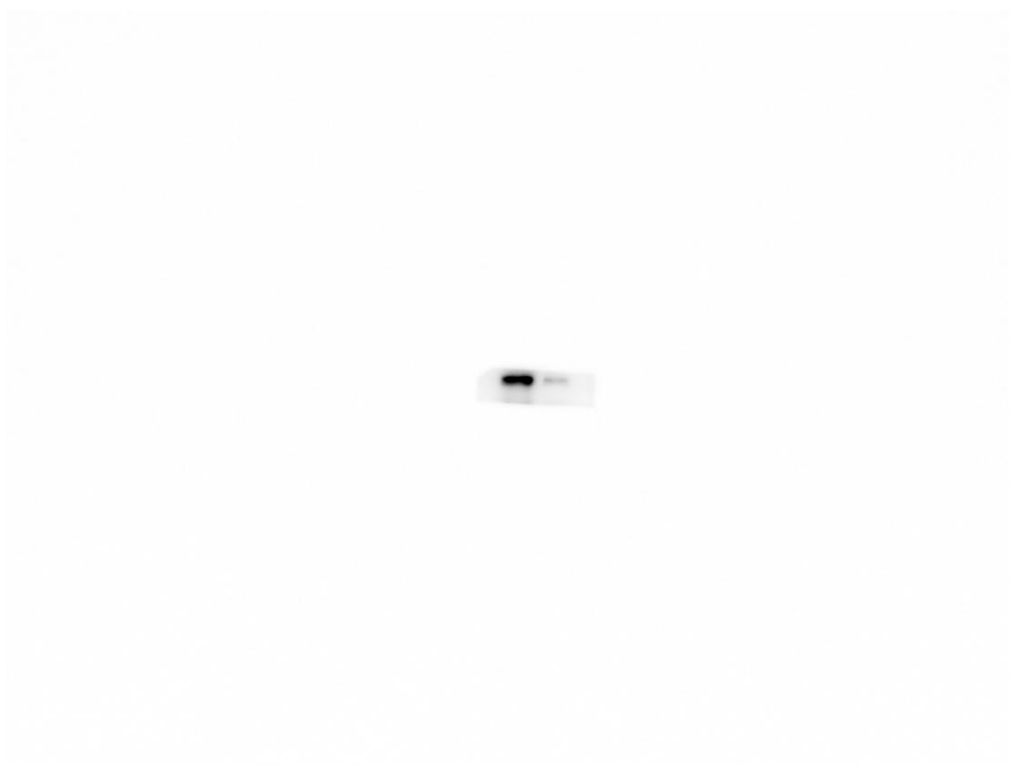

Figure 5E  $\beta$ -actin

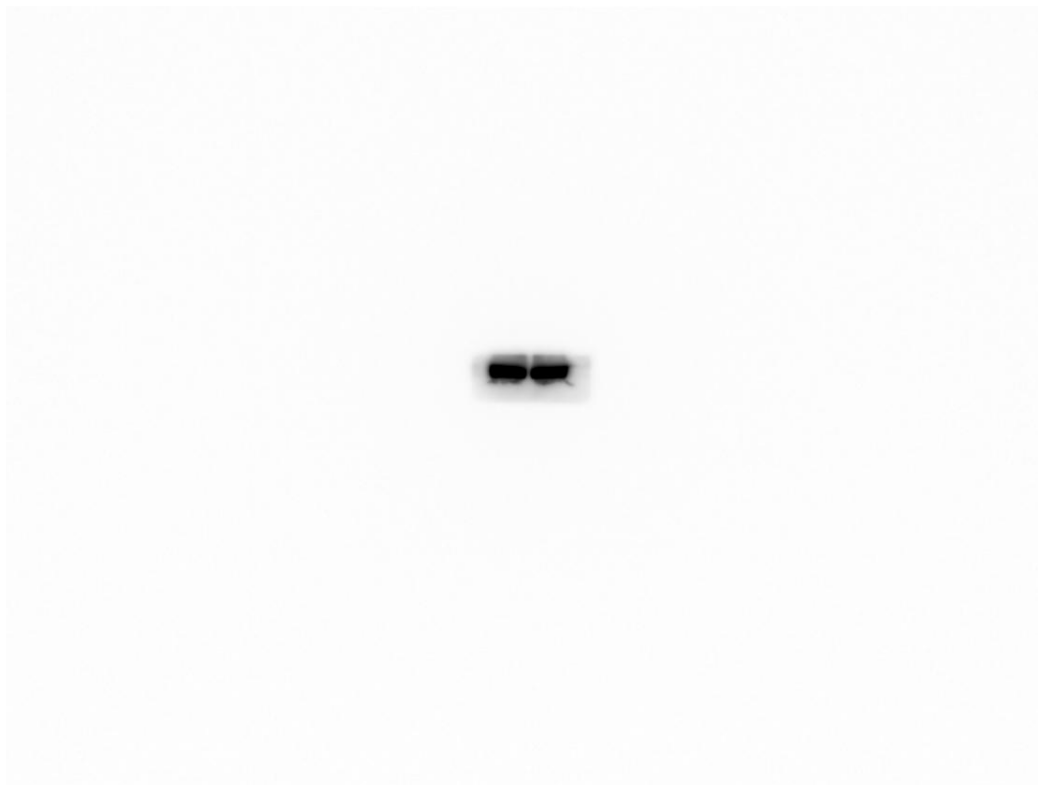

Supplementary Figure 1A PHB1

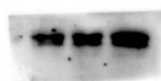



Supplementary Figure 1A  $\beta$ -actin

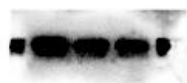

Supplementary Figure 1C PHB1

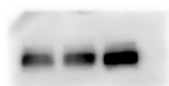

Supplementary Figure 1C  $\beta$ -actin

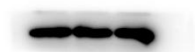

Supplementary Figure 1E PHB1

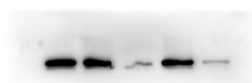

Supplementary Figure 1E  $\beta$ -actin

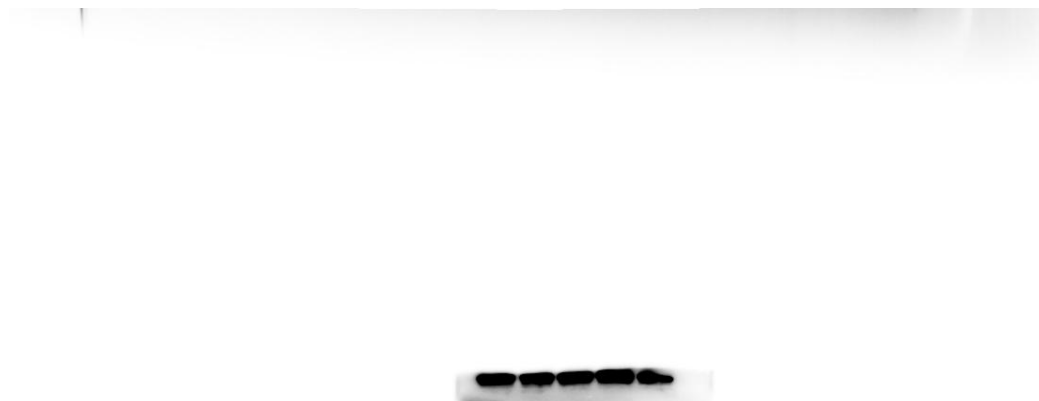

Supplementary Figure 1G PHB1

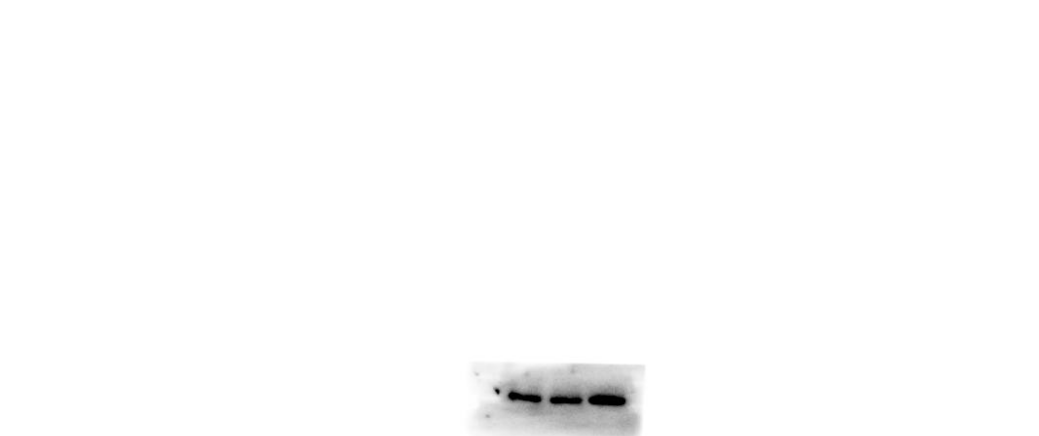

Supplementary Figure 1G  $\beta$ -actin

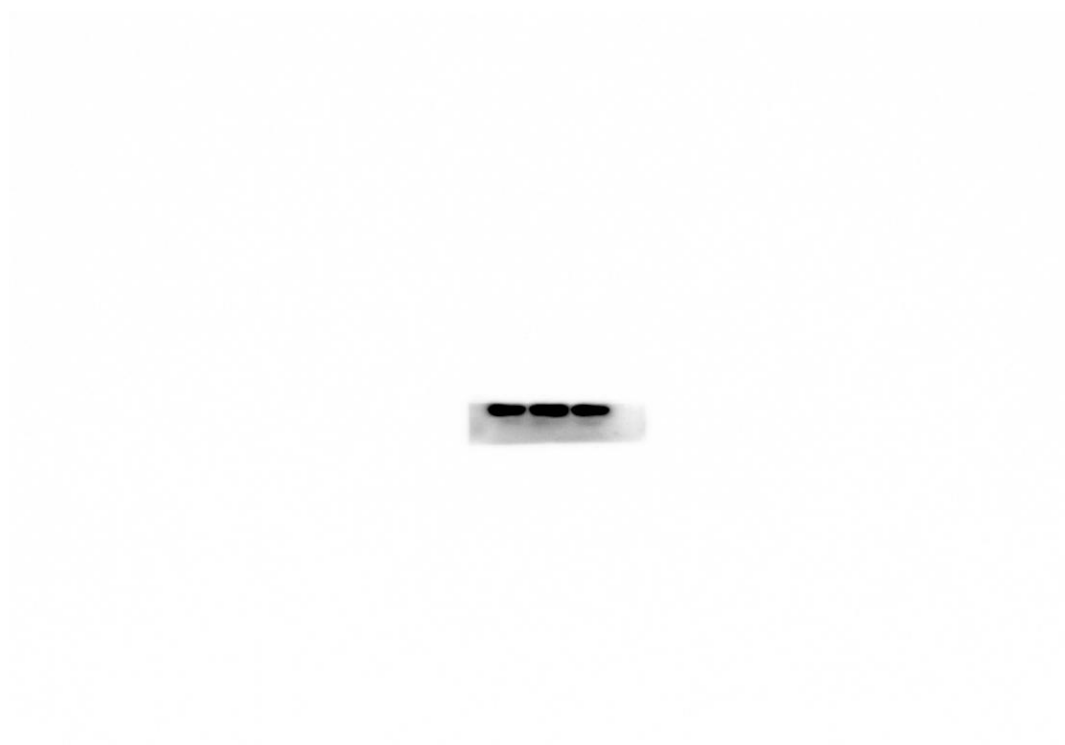

Supplementary Figure 1I PHB1

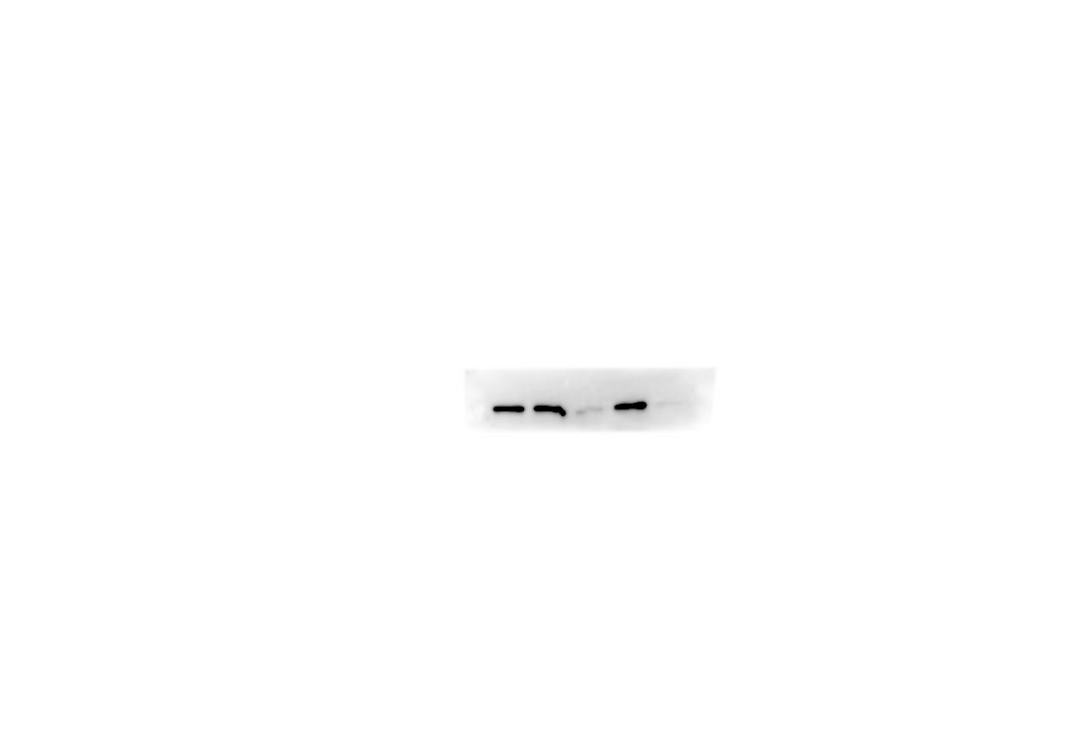

Supplementary Figure 1I  $\beta$ -actin

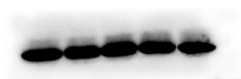

Supplement: Supplementary file 1 [file 312b7aaefe25188d122bdbe2.pdf]
